1 **Systematic analysis of the *Myxococcus xanthus* developmental gene regulatory network supports**  
2 **posttranslational regulation of FruA by C-signaling**

3

4 Running title: C-signaling regulates FruA posttranslationally

5

6 **Shreya Saha<sup>1</sup>, Pintu Patra<sup>2</sup>, Oleg Igoshin<sup>2</sup>, Lee Kroos<sup>1\*</sup>**

7

8 <sup>1</sup>Department of Biochemistry and Molecular Biology, Michigan State University, East Lansing, MI  
9 48824, USA.

10 <sup>2</sup>Department of Bioengineering, Rice University, Houston, TX 77030, USA.

11 For correspondence. \*E-mail [kroos@msu.edu](mailto:kroos@msu.edu); Tel. (+1) 517 355 9726; Fax (+1) 517 353 9334.

12

13 Keywords: gene regulatory networks, signal transduction, transcription factors, developmental genes,  
14 bacterial spores, *Myxococcus xanthus*

15

16 **Acknowledgements**

17 We thank Monique Floer for advice about high-throughput qPCR and for use of the LightCycler® 480

18 System. We thank Emily Titus for constructing pET1 and *M. xanthus* strain MET1. We thank

19 Montserrat Elias-Arnanz and Penelope Higgs for sharing strains. This work was supported by the

20 National Science Foundation (award MCB-1411272) and by salary support for L.K. from Michigan State

21 University AgBioResearch.

22

23 **Systematic analysis of the *Myxococcus xanthus* developmental gene regulatory network supports**  
24 **posttranslational regulation of FruA by C-signaling**

25

26 **Summary**

27 Upon starvation *Myxococcus xanthus* undergoes multicellular development. Rod-shaped cells move  
28 into mounds in which some cells differentiate into spores. Cells begin committing to sporulation at 24-  
29 30 h poststarvation, but the mechanisms governing commitment are unknown. FruA and MrpC are  
30 transcription factors that are necessary for commitment. They bind cooperatively to promoter regions  
31 and activate developmental gene transcription, including that of the *dev* operon. Leading up to and  
32 during the commitment period, *dev* mRNA increased in wild type, but not in a mutant defective in C-  
33 signaling, a short-range signaling interaction between cells that is also necessary for commitment. The  
34 C-signaling mutant exhibited ~20-fold less *dev* mRNA than wild type at 30 h poststarvation, despite a  
35 similar level of MrpC and only twofold less FruA. Boosting the FruA level twofold in the C-signaling  
36 mutant had little effect on the *dev* mRNA level, and *dev* mRNA was not less stable in the C-signaling  
37 mutant. Neither did high cooperativity of MrpC and FruA binding upstream of the *dev* promoter  
38 explain the data. Rather, our systematic experimental and computational analyses support a model in  
39 which C-signaling activates FruA at least ninefold posttranslationally in order to commit a cell to spore  
40 formation.

41

42 **Keywords:** gene regulatory networks, signal transduction, transcription factors, developmental genes,  
43 bacterial spores, *Myxococcus xanthus*

44

## 45 **Introduction**

46 Differentiated cell types are a hallmark of multicellular organisms. Understanding how pluripotent  
47 cells become restricted to particular cell fates is a fascinating question and a fundamental challenge in  
48 biology. In general, the answer involves a complex interplay between signals and gene regulation. This  
49 is true both during development of multicellular eukaryotes (Davidson & Levine, 2008, Frum & Ralston,  
50 2015, Drapek *et al.*, 2017) and during transitions in microbial communities (van Gestel *et al.*, 2015,  
51 Norman *et al.*, 2015, Bush *et al.*, 2015, Kroos, 2017). Bacterial cells in microbial communities adopt  
52 different fates as gene regulatory networks (GRNs) respond to a variety of signals, including some  
53 generated by other cells. Moreover, we now understand that microbial communities or microbiomes  
54 profoundly impact eukaryotic organisms, and vice versa (Barratt *et al.*, 2017, Jansson & Hofmockel,  
55 2018). Yet the daunting complexity of microbiomes and multicellular eukaryotes impedes efforts to  
56 fully understand their interactions in molecular detail. By studying simpler model systems, paradigms  
57 can be discovered that can guide investigations of more complex interactions.

58 A relatively simple model system is provided by the bacterium *Myxococcus xanthus*, which  
59 undergoes starvation-induced multicellular development (Yang & Higgs, 2014). In response to  
60 starvation, cells generate intracellular and extracellular signals that regulate gene expression (Bretl &  
61 Kirby, 2016, Kroos, 2017). The rod-shaped cells alter their movements so that thousands form a  
62 mound. Within a mound, cells differentiate into ovoid spores that resist stress and remain dormant  
63 until nutrients reappear. The spore-filled mound is called a fruiting body. Other cells adopt a different  
64 fate and remain outside the fruiting body as peripheral rods (O'Connor & Zusman, 1991). A large  
65 proportion of the cells lyse during the developmental process (Lee *et al.*, 2012). What determines  
66 whether a given cell in the population forms a spore, remains as a peripheral rod, or undergoes lysis?

67 *M. xanthus* provides an attractive model system to discover how signaling between cells affects a GRN  
68 and determines cell fate. Here, we focus on a circuit that regulates commitment to sporulation.

69 In a recent study, cells committed to spore formation primarily between 24 and 30 h poststarvation  
70 (PS), because addition of nutrients to the starving population prior to 24 h PS blocked subsequent  
71 sporulation, addition at 24 h PS allowed a few spores to form subsequently, and addition at 30 h PS  
72 allowed many more spores to form (Rajagopalan & Kroos, 2014). At the molecular level, addition of  
73 nutrients before or during the commitment period caused rapid proteolysis of MrpC (Rajagopalan &  
74 Kroos, 2014), a transcription factor required for fruiting body formation (Sun & Shi, 2001b, Sun & Shi,  
75 2001a).

76 MrpC appears to directly regulate more than one hundred genes involved in development  
77 (Robinson *et al.*, 2014), and one well-characterized MrpC target gene, *fruA* (Ueki & Inouye, 2003),  
78 codes for another transcription factor required for fruiting body formation (Ogawa *et al.*, 1996). FruA  
79 and MrpC bind cooperatively to the promoter regions of many genes, and appear to activate  
80 transcription (Campbell *et al.*, 2015, Lee *et al.*, 2011, Mittal & Kroos, 2009a, Mittal & Kroos, 2009b,  
81 Robinson *et al.*, 2014, Son *et al.*, 2011). In particular, transcription of the *dev* operon appears to be  
82 activated by cooperative binding of the two transcription factors at two sites located upstream of the  
83 promoter (Campbell *et al.*, 2015). Because mutations in three genes of the *dev* operon (*devTRS*)  
84 strongly impair sporulation (Boysen *et al.*, 2002, Thony-Meyer & Kaiser, 1993, Viswanathan *et al.*,  
85 2007a), the feed-forward loop involving MrpC and FruA regulation of the *dev* operon is an attractive  
86 molecular mechanism to control spore formation (Fig. 1). Recent work revealed that products of the  
87 *dev* operon act as a timer for sporulation (Rajagopalan & Kroos, 2017). DevTRS negatively autoregulate

88 expression of *DevI*, which inhibits sporulation if overproduced, and delays sporulation by about 6 h  
89 when produced normally (Rajagopalan & Kroos, 2017, Rajagopalan *et al.*, 2015) (Fig. 1).

90 Expression of the *dev* operon and many other developmental genes depends on C-signaling (Kroos  
91 & Kaiser, 1987), which has been proposed to activate FruA (Ellehaug *et al.*, 1998) and/or MrpC (Mittal  
92 & Kroos, 2009a) (Fig. 1), although the mechanism of C-signal transduction remains a mystery. Null  
93 mutations in the *csgA* gene block C-signaling and sporulation, but the mutants can be rescued by co-  
94 development with *csgA*<sup>+</sup> cells which supply the C-signal (Shimkets *et al.*, 1983). C-signaling appears to  
95 be a short-range signaling interaction that requires cells to move into alignment (Kim & Kaiser, 1990c,  
96 Kim & Kaiser, 1990b, Kroos *et al.*, 1988), as they do during mound formation (Sager & Kaiser, 1993).  
97 Two theories about the identity of the C-signal have emerged. One theory states that the C-signal is a  
98 17-kDa fragment of CsgA produced by the specific proteolytic activity of PopC at the cell surface (Kim &  
99 Kaiser, 1990a, Lobedanz & Sogaard-Andersen, 2003, Rolbetzki *et al.*, 2008). The other theory is that  
100 diacylglycerols released from the inner membrane by cardiolipin phospholipase activity of intact CsgA  
101 are the C-signal (Boynton & Shimkets, 2015). However, in neither case has the signal receptor been  
102 identified, so our understanding of C-signaling is incomplete. Likewise, how C-signaling impacts  
103 recipient cells is unknown.

104 One way that C-signaling has been proposed to affect recipient cells is to stimulate  
105 autophosphorylation of a histidine protein kinase, which would then transfer the phosphate to FruA  
106 (Ellehaug *et al.*, 1998). This model was attractive because FruA is similar to response regulators of  
107 two-component signal transduction systems (Ellehaug *et al.*, 1998, Ogawa *et al.*, 1996). Typically, a  
108 response regulator is phosphorylated by a histidine protein kinase in response to a signal, thus  
109 activating the response regulator to perform a function (Stock *et al.*, 2000). The effects of substitutions

110 at the predicted site of phosphorylation in FruA supported the model that FruA is activated by  
111 phosphorylation on D59 (Ellehauge et al., 1998). However, a histidine protein kinase capable of  
112 phosphorylating FruA has not been identified. Also, several observations suggest that FruA may not be  
113 phosphorylated. Most notably, D59 of FruA is present in an atypical receiver domain that lacks a  
114 conserved metal-binding residue normally required for phosphorylation to occur, and treatment of  
115 FruA with small-molecule phosphodonors did not increase its DNA-binding activity (Mittal & Kroos,  
116 2009a). The receiver domain of FruA was shown to be necessary for cooperative binding with MrpC to  
117 DNA, so it was proposed that C-signaling may affect activity of MrpC and/or FruA (Mittal & Kroos,  
118 2009a) (Fig. 1).

119 The regulation of MrpC has been reported to be complex, involving autoregulation,  
120 phosphorylation, proteolytic processing, binding to a toxin protein, and stability (Sun & Shi, 2001b,  
121 Nariya & Inouye, 2005, Nariya & Inouye, 2006, Nariya & Inouye, 2008, Schramm *et al.*, 2012,  
122 Rajagopalan & Kroos, 2014, McLaughlin *et al.*, 2018). Also, since MrpC is similar to CRP family  
123 transcription factors that bind cyclic nucleotides (Sun & Shi, 2001b), MrpC activity could be modulated  
124 by nucleotide binding, so there are many ways in which C-signaling could affect MrpC activity (Mittal &  
125 Kroos, 2009a).

126 Here, using synergistic experimental and computational approaches, we investigate the impact of  
127 C-signaling on a circuit that regulates commitment to sporulation by focusing on the feed-forward loop  
128 involving MrpC and FruA control of *dev* operon transcription (Fig. 1). We describe methods to  
129 systematically and quantitatively study the developmental process. Using these methods we measure  
130 the levels of GRN components in wild type and in mutants (e.g., a *csgA* mutant unable to produce C-  
131 signal) during the period leading up to and including commitment to spore formation. We then

132 formulate a mathematical model for the steady-state concentration of *dev* mRNA and use the model to  
133 computationally predict the magnitude of potential regulatory effects of C-signaling that would be  
134 required to explain our data. By testing the predictions, some potential regulatory mechanisms are  
135 ruled out and at least ninefold activation of FruA by C-signaling is supported.

136

## 137 **Results**

### 138 ***M. xanthus* development can be studied systematically**

139 We first established quantitative assays to analyze cellular and molecular changes during *M. xanthus*  
140 development. To facilitate collection of sufficient cell numbers for counting, as well as for RNA and  
141 protein measurements, development was induced by starvation under submerged culture conditions.  
142 Cells adhere to the bottom of a plastic well or dish, and develop under a layer of buffer. Prior to cell  
143 harvest, photos were taken to document phenotypic differences between strains. As expected, wild-  
144 type strain DK1622 formed mounds by 18 h poststarvation (PS) and the mounds matured into  
145 compact, darkened fruiting bodies at later times (Fig. 2). In contrast, *csgA* and *fruA* null mutants failed  
146 to progress beyond forming loose aggregates. A *devI* null mutant was similar to wild type (WT),  
147 whereas a *devS* null mutant formed mounds slowly and they failed to darken. Developing populations  
148 were harvested at the times indicated in Figure 2 to measure cellular and molecular changes in the  
149 same populations.

150 To quantify changes at the cellular level, we counted the total number of cells (after fixation and  
151 dispersal, so that rod-shaped cells, spores, and cells in transition between the two were counted) and  
152 the number of sonication-resistant spores in the developing populations. We also counted the number  
153 of rod-shaped cells at the time when development was initiated by starvation ( $T_0$ ). By subtracting the

154 number of sonication-resistant spores from the total cell number, we determined the number of  
155 sonication-sensitive cells. About 30% of the wild-type cells present at  $T_0$  remained as sonication-  
156 sensitive cells at 18 h PS (Fig. S1A), consistent with the suggestion that the majority of cells lyse early  
157 during development under submerged culture conditions, which was based on the total protein  
158 concentration of developing cultures (Rajagopalan & Kroos, 2014). The number of sonication-sensitive  
159 cells continued to decline after 18 h PS, reaching ~4% of the  $T_0$  number by 48 h PS (Fig. S1A). Spores  
160 were first observed at 27 h PS and the number rose to ~1% of the  $T_0$  number by 48 h PS (Fig. S1B). The  
161 *devI* mutant was similar to WT, except spores were first observed 6 h earlier at 21 h PS, as reported  
162 recently (Rajagopalan & Kroos, 2017). The *csgA*, *fruA*, and *devS* mutants failed to make a detectable  
163 number of spores (at a detection limit of 0.01% of the  $T_0$  number) and appeared to be slightly delayed  
164 relative to WT and the *devI* mutant in terms of the declining number of sonication-sensitive cells (Fig.  
165 S1). We conclude that at the cellular level during the time between 18 and 30 h PS (when we  
166 measured RNA and protein levels as described below), the developing populations decline from ~30-  
167 40% to ~10-20% of the initial rod number and only ~0.5% (WT, *devI*) or <0.01% (*csgA*, *fruA*, *devS*) of the  
168 cells form sonication-resistant spores (from which the RNAs and proteins we measured would not be  
169 recovered based on control experiments). We stopped collecting samples at 30 PS because thereafter  
170 the number of sonication-sensitive cells continues to decline and the spore number continues to rise,  
171 making RNA and protein more difficult to recover quantitatively, yet many cells are committed at 30 h  
172 PS to make spores by 36 h PS even if nutrients are added (Rajagopalan & Kroos, 2014). Hence, we  
173 focused on changes at the molecular level between 18 and 30 h PS, the period leading up to and  
174 including the time that many cells commit to spore formation.



175 To measure RNA levels of a large number of samples, we adapted methods described previously  
176 (Rajagopalan & Kroos, 2014) to a higher-throughput robotic platform for RT-qPCR analysis.  
177 Reproducibility of the analysis was tested among biological replicates and two types of technical  
178 replicates as illustrated in Figure S2A, for each RNA to be measured, at 24 h PS, the midpoint of our  
179 focal period. No normalization was done in this experiment. Each transcript number was derived from  
180 a standard curve of genomic DNA subjected to qPCR. For each RNA, we found that the average  
181 transcript number and the standard deviation for three cDNA technical replicates from a single RNA  
182 sample, three RNA technical replicates from a single biological replicate, and three biological  
183 replicates, was not significantly different (single factor ANOVA,  $\alpha = 0.05$ ) (Fig. S2B-S2E). These results  
184 suggest that biological variation in RNA levels at 24 h PS is comparable to technical variation in  
185 preparing RNA and cDNA. In subsequent experiments, we measured RNA for at least three biological  
186 replicates and we did not perform RNA or cDNA technical replicates. We also note the high abundance  
187 of the *mrpC* transcript (~10%) relative to 16S rRNA, and the lower relative abundance of the *fruA* (~1%)  
188 and *dev* (~0.1%) transcripts.

189 We have typically used 16S rRNA as an internal standard for RT-qPCR analysis during *M. xanthus*  
190 development (Rajagopalan & Kroos, 2014). The high abundance of *mrpC* transcript relative to 16S  
191 rRNA at 24 h PS (Fig. S2B and S2E) raised the possibility that rRNA decreases relative to total RNA at 18  
192 to 30 h PS. To test this possibility, we measured the 16S rRNA level per  $\mu\text{g}$  of total RNA from 18 to 30 h  
193 PS. Figure S3A shows that the level does not change significantly (single factor ANOVA,  $\alpha = 0.05$ ),  
194 validating 16S rRNA as an internal standard for subsequent experiments. We also found that the total  
195 RNA yield per cell does not change significantly from 18 to 30 h PS (single factor ANOVA,  $\alpha = 0.05$ ) (Fig.

196 S3B), consistent with the finding that the 16S rRNA level does not change significantly, since the  
197 majority of total RNA is rRNA.

198 To measure protein levels, a portion of each well-mixed developing population was immediately  
199 added to sample buffer, boiled, and frozen for subsequent semi-quantitative immunoblot analysis  
200 (Rajagopalan & Kroos, 2017). The rest of the population was used for cell counting and RNA analysis as  
201 described above and in the Experimental Procedures.

202

### 203 ***Levels of MrpC and FruA fail to account for the low level of dev mRNA in a csgA mutant***

204 By systematically quantifying protein and mRNA levels during the period leading up to and including  
205 the time that cells commit to spore formation, we investigated whether the GRN shown in Figure 1  
206 could account for observed changes over time in WT and in mutants. In particular, we were interested  
207 in whether changes in the levels of MrpC and/or FruA proteins could account for the observed changes  
208 in the level of *dev* mRNA, since MrpC and FruA bind cooperatively to the *dev* promoter region and  
209 activate transcription (Campbell et al., 2015). In WT, we found that the MrpC level did not change  
210 significantly from 18 to 30 h PS (Fig. 3A) and the FruA level rose about 1.5-fold on average (Fig. 3B),  
211 whereas the *dev* mRNA level rose about threefold on average (Fig. 4A). We reasoned that cooperative  
212 binding of MrpC and FruA could easily account for the larger rise in *dev* mRNA. We also measured the  
213 levels of *mrpC* and *fruA* mRNA. The *mrpC* mRNA level did not change significantly (Fig. 4B), consistent  
214 with the MrpC protein level, but the *fruA* mRNA level decreased about twofold on average after 18 h  
215 PS (Fig. 4C), in contrast to the rise in the FruA protein level (Fig. 3B), suggesting positive  
216 posttranscriptional regulation of the FruA level during the period of commitment to spore formation.

217 To investigate how C-signaling affects the GRN shown in Figure 1, we measured protein and mRNA  
218 levels in the *csgA* null mutant. In agreement with earlier studies suggesting that C-signaling activates  
219 FruA (Ellehaug et al., 1998) and/or MrpC (Mittal & Kroos, 2009a), we found very little *dev* mRNA in  
220 the *csgA* mutant (Fig. 4A). Notably, the large decrease in the level of *dev* mRNA in the *csgA* mutant  
221 compared with WT could not be accounted for by a large decrease in the level of MrpC or FruA. The  
222 MrpC level was elevated about 1.5-fold on average in the *csgA* mutant relative to WT (Fig. 3A), but the  
223 differences were not statistically significant ( $p < 0.05$  in Student's unpaired, two-tailed *t*-tests). The  
224 FruA level was diminished in the *csgA* mutant relative to WT, but only about twofold on average (Fig.  
225 3B). The differences in the FruA level were statistically significant at most time points, but alone the  
226 twofold lower levels of FruA in the *csgA* mutant fail to account for the very low levels of *dev* mRNA.

227 The *mrpC* and *fruA* mRNA levels were diminished about twofold and 1.5-fold on average,  
228 respectively, in the *csgA* mutant relative to WT (Fig. 4B and 4C), but at most time points the differences  
229 were not statistically significant. The lack of significant differences in the level of *fruA* mRNA is  
230 especially noteworthy, since it implies that C-signaling has little or no effect on MrpC activity. The  
231 results of our *fruA* mRNA measurements agree with published reports using *fruA-lacZ* fusions  
232 (Ellehaug et al., 1998, Srinivasan & Kroos, 2004). Furthermore, we found that *fruA* mRNA stability is  
233 similar in the *csgA* mutant and in WT at 30 h PS (Fig. S4), indicating that the similar steady-state *fruA*  
234 mRNA level we observed (Fig. 4C) reflects a similar rate of synthesis, rather than altered synthesis  
235 compensated by altered stability. We conclude that C-signaling does not affect MrpC activity.  
236 Therefore, the low level of *dev* mRNA in a *csgA* mutant (Fig. 4A) could be due to failure to activate FruA  
237 or to *dev*-specific regulatory mechanisms.

238 To begin to characterize potential *dev*-specific regulatory mechanisms during the period leading up  
239 to and including commitment to sporulation, we measured protein and mRNA levels in the *devS* and  
240 *devI* null mutants. The MrpC and FruA levels were similar to WT (Fig. 3). The *dev* mRNA level ranged  
241 from 20-fold higher in the *devS* mutant than in WT at 18 h PS, to 10-fold higher at 30 h PS (Fig. 4A),  
242 consistent with negative autoregulation by DevS (and DevT and DevR) reported previously  
243 (Rajagopalan & Kroos, 2017, Rajagopalan et al., 2015). Unexpectedly, the *dev* mRNA level in the *devI*  
244 mutant was about threefold lower than in WT at 30 h PS (Fig. 4A), suggesting that DevI feeds back  
245 positively on accumulation of *dev* mRNA. The only other statistically significant differences were that  
246 the *fruA* mRNA levels in the *devI* and *devS* mutants were about twofold lower than in WT at 27 and 30  
247 h PS (Fig. 4C). Since the FruA levels in these mutants were similar to those in WT (Fig. 3B), positive  
248 posttranscriptional regulation of FruA appeared to occur in the mutants, as well as in WT.

249 To complete our characterization of the GRN shown in Figure 1, we also measured protein and  
250 mRNA levels in the *fruA* and *mrpC* null mutants. We did not collect samples of the *mrpC* mutant at as  
251 many time points since we expected little or no expression of GRN components. As expected, neither  
252 MrpC nor FruA were detected in the *mrpC* mutant (Fig. S5). In the *fruA* mutant, the MrpC level was  
253 similar to WT and, as expected, FruA was not detected (Fig. 3). Also as expected, in the *fruA* mutant  
254 the *fruA* mRNA was not detected, the *dev* mRNA level was very low, and the *mrpC* mRNA level was  
255 similar to WT (Fig. 4). Since the *mrpC* mutant had an in-frame deletion of codons 74 to 229 (Sun & Shi,  
256 2001b), we were able to design primers for RT-qPCR analysis that should detect the shorter *mrpC*  
257 transcript. Surprisingly, the *mrpC* mutant exhibited an elevated level of *mrpC* transcript compared with  
258 WT at 18 and 24 h PS (Fig. S6A). The result was surprising since expression of an *mrpC-lacZ* fusion had  
259 been reported to be abolished in the *mrpC* mutant, which had led to the conclusion that MrpC

260 positively autoregulates (Sun & Shi, 2001b). We considered the possibility that the shorter transcript in  
261 the *mrpC* mutant is more stable than the WT transcript, but the transcript half-lives after addition of  
262 rifampicin did not differ significantly (Fig. S7). We conclude that MrpC negatively regulates the *mrpC*  
263 transcript level. While this work was in progress, McLaughlin *et al.* reached the same conclusion  
264 (McLaughlin *et al.*, 2018). In all other respects, the *mrpC* mutant yielded expected results. The *fruA*  
265 and *dev* transcripts were very low (Fig. S6B and S6C), consistent with the expectations that MrpC is  
266 required to activate *fruA* transcription (Ueki & Inouye, 2003) and that MrpC and FruA are required to  
267 activate *dev* transcription (Campbell *et al.*, 2015, Ellehauge *et al.*, 1998, Viswanathan *et al.*, 2007b).  
268 Also, the *mrpC* mutant failed to progress beyond forming loose aggregates (Fig. S8), appeared to be  
269 slightly delayed relative to WT in terms of the declining number of sonication-sensitive cells (Fig. S9A),  
270 and failed to make a detectable number of spores (at a detection limit of 0.01% of the  $T_0$  number) (Fig.  
271 S9B).

272 Taken together, our systematic, quantitative measurements of components of the GRN shown in  
273 Figure 1 imply that failure to activate FruA and/or *dev*-specific regulatory mechanisms may account for  
274 the low level of *dev* mRNA in a *csgA* mutant. Given the complex feedback architecture of *dev*  
275 regulation (i.e., strong negative feedback by DevTRS and weak positive feedback by DevI at 30 h PS),  
276 delineating the effects of C-signaling on the *dev* transcript level requires a mathematical modeling  
277 approach.

278

279 ***Mathematical modeling suggests several mechanisms that could explain the low level of dev mRNA***  
280 ***in the csgA mutant***

281 The observed small differences in the levels of MrpC and FruA in the *csgA* mutant relative to WT do not  
 282 account for the very low level of *dev* mRNA in the *csgA* mutant. To evaluate plausible mechanisms that  
 283 may explain these experimental findings, we quantitatively analyzed transcriptional regulation of *dev*  
 284 by formulating a mathematical model that expresses the *dev* mRNA concentration as a function of the  
 285 regulators MrpC, FruA, DevI, and DevS. MrpC and FruA bind cooperatively to the *dev* promoter region  
 286 and activate transcription (Campbell et al., 2015). Our results suggest that DevI is a weak positive  
 287 regulator and DevS is a strong negative regulator of *dev* transcription by 30 h PS (Fig. 4A).  
 288 Incorporating these effects into a transcriptional regulation model, we express the concentration of  
 289 *dev* mRNA as a product of three regulation functions ( $\Pi_{FM}$ ,  $\Pi_I$ ,  $\Pi_S$ ) divided by the transcript  
 290 degradation rate  $\delta_{dev}$  (see Experimental Procedures for detailed explanation):

$$291 \quad [mRNA_{dev}] = \frac{1}{\delta_{dev}} \underbrace{\left( \alpha_{FM} \frac{\left( \frac{[FruA][MrpC]}{K_{FM}} \right)^a}{1 + \left( \frac{[FruA][MrpC]}{K_{FM}} \right)^a} \right)}_{\Pi_{FM}} \underbrace{\left( 1 + \alpha_I \frac{\left( \frac{[DevI]}{K_I} \right)^b}{1 + \left( \frac{[DevI]}{K_I} \right)^b} \right)}_{\Pi_I} \underbrace{\left( \frac{1}{1 + \left( \frac{[DevS]}{K_S} \right)^c} \right)}_{\Pi_S}$$

292 Here, we use a quasi-steady state approximation for the mRNA levels by taking advantage of the fact  
 293 that mRNA decay (with half-lives typically in minutes) is much faster than our experimental  
 294 measurement times (in hours). This allows us to assume a rapid equilibrium between the rate of *dev*  
 295 transcription and the decay of its mRNA, which leads to the above equation, in which  
 296  $\alpha_{FM}$ ,  $\alpha_I$ ,  $\delta_{dev}$ ,  $a$ ,  $b$ ,  $c$ ,  $K_{FM}$ ,  $K_I$  and  $K_S$  are parameters characterizing promoter regulation. We assume  
 297 that these biochemical parameters are not a function of the genetic background and, therefore, in the  
 298 strains in which *dev* mRNA was measured (e.g., the *csgA* mutant), the concentration of *dev* mRNA is  
 299 determined by the concentrations of proteins (indicated by square brackets in the equation), more  
 300 specifically the concentrations of their transcriptionally active forms (in case there is a

301 posttranslational regulation). To estimate how the different regulation parameters (such as  
302 transcription rate, degradation rate, cooperativity constant, etc.) affect the *dev* mRNA level, we first  
303 constrain the model parameters by the experimental result shown in Figure 3B,  $[\text{FruA}]_{\text{WT}}/$   
304  $[\text{FruA}]_{\text{csgA}} \cong 2$ , and search for parameters that can result in the observed 22-fold difference  
305 in  $[\text{mRNA}_{\text{dev}}]$  in WT relative to the *csgA* mutant at 30 h PS (Fig. 4A).

306 To estimate the contribution of autoregulation by Dev proteins to their own transcription (i.e., the  
307 terms  $\Pi_I, \Pi_S$ ) in WT and the *csgA* mutant, we employ the data from the *devI* and *devS* mutants (Fig.  
308 4A). Specifically, we take the ratio of the *dev* mRNA level in WT to that in *devI* and *devS* mutants to  
309 estimate the feedback regulation from DevI and DevS, respectively (see Experimental Procedures for  
310 details). We find the contribution from DevI and DevS feedback regulation in WT to be  $\Pi_{I,\text{WT}} = 2.9$   
311 and  $\Pi_{S,\text{WT}} = 0.091$ , respectively. Using these values, we find the contribution from FruA and MrpC  
312 regulation to be  $\Pi_{\text{FM},\text{WT}}/\delta_{\text{dev},\text{WT}} = 11$ . In the *csgA* mutant, since the *dev* mRNA level is very low, we  
313 assume the DevI and DevS protein levels to be low. This gives the contribution of different regulation  
314 functions as  $\Pi_{I,\text{csgA}} \approx 1$ ,  $\Pi_{S,\text{csgA}} \approx 1$ , and  $\Pi_{\text{FM},\text{csgA}}/\delta_{\text{dev},\text{csgA}} = 0.13$ . In summary, this analysis reveals  
315 that the twofold reduction of FruA protein observed in the *csgA* mutant (Fig. 3B) leads to a change  
316 of  $(\Pi_{\text{FM},\text{WT}}/\Pi_{\text{FM},\text{csgA}})(\delta_{\text{dev},\text{csgA}}/\delta_{\text{dev},\text{WT}}) \approx 84$ -fold in the FruA- and MrpC-dependent transcript  
317 regulation term. We reasoned that the observed 22-fold reduction in *dev* transcript in the *csgA* mutant  
318 relative to WT at 30 h PS (Fig. 4A) could result from a reduction in the FruA- and MrpC-dependent  
319 activation rate  $\Pi_{\text{FM}}$  and/or an increase in the transcript degradation rate  $\delta_{\text{dev}}$ . In what follows we use  
320 the mathematical model to predict the magnitude of these effects that would be necessary to explain  
321 the observed 22-fold difference in  $[\text{mRNA}_{\text{dev}}]$ .

322 • **Hypothesis 1:** Increase in *dev* transcript degradation rate in the *csgA* mutant

323 First, we estimate the difference in *dev* transcript degradation rate necessary to explain the observed  
324 difference in transcript level between WT and the *csgA* mutant. For this, we make two assumptions.  
325 First, we assume that MrpC and FruA bind to the *dev* promoter region with a Hill cooperativity  
326 coefficient  $a = 2$  (i.e., the maximum for a single cooperative binding site). Second, we assume that the  
327 observed twofold difference in FruA protein level results in a twofold difference in transcriptionally  
328 active FruA. Under these assumptions, we vary the remaining unknown parameters to compute the  
329 required fold difference in transcript degradation rate for different values of promoter saturation. Our  
330 results plotted in Figure 5A show that at least a 20-fold difference in transcript degradation rate is  
331 required to explain the transcript data. This experimentally testable prediction will be assessed in a  
332 subsequent section. If the results are inconsistent with this prediction, we must conclude that at least  
333 one of the two assumptions above is invalid, resulting in the following two alternative hypotheses: the  
334 Hill coefficient of MrpC and FruA binding to the *dev* promoter region is much higher than  $a = 2$  and/or  
335 the amount of transcriptionally active FruA does not scale with the measured FruA protein level (e.g., if  
336 *csgA*-dependent C-signaling is also involved in posttranslational activation of FruA).

337 • **Hypothesis 2:** High cooperativity of MrpC and FruA binding to the *dev* promoter region  
338 Next, we test if a higher binding cooperativity can explain the difference in *dev* transcript level  
339 between WT and the *csgA* mutant. We compute the required cooperativity coefficient by assuming  
340 the degradation rate does not change between the two strains. Our results plotted in Figure 5B show  
341 that the minimum cooperativity coefficient required to explain the experimental results is six for low  
342 promoter saturation. In biologically realistic conditions, where promoter saturation is higher; the  
343 required cooperativity is even higher. Such a large cooperativity can only be explained if there is more  
344 than one site in the promoter region where MrpC and FruA bind with high cooperativity. We know



345 that the *dev* promoter region has at least two MrpC and FruA cooperative binding sites; one is proximal  
346 upstream, whereas the other is distal upstream (Campbell et al., 2015). The distal upstream binding  
347 site appeared to boost *dev* promoter activity after 24 h PS, based on  $\beta$ -galactosidase activity from a  
348 *lacZ* reporter. Hence, in a subsequent section, we study the impact of a distal site deletion on different  
349 transcripts (*mrpC*, *fruA*, *dev*) and proteins (MrpC, FruA) to test if presence of the distal site contributes  
350 to higher cooperativity. If the results are not consistent with the model predictions, we must conclude  
351 that the fold difference in active FruA exceeds that observed for the total concentration of each  
352 protein (i.e., *csgA*-dependent C-signaling is involved in posttranslational activation of FruA).

353 • **Hypothesis 3:** Posttranslational regulation of FruA activity

354 To assess the difference in active FruA level required to explain the observed difference in *dev*  
355 transcript level, in the absence of other effects, we fix the cooperativity coefficient at  $\alpha = 2$  and  
356 assume the transcript degradation rate to be unchanged between WT and the *csgA* mutant. We then  
357 use our model to compute the fold difference in active FruA required to achieve a 22-fold reduction in  
358 *dev* transcript in the *csgA* mutant relative to WT. Our results plotted in Figure 5C show that at least a  
359 ninefold reduction in active FruA is needed in the *csgA* mutant. The reduction in active FruA in the  
360 *csgA* mutant would presumably be due to the absence of C-signal-dependent posttranslational  
361 activation of FruA, not due to the twofold lower level of FruA protein we observed in the *csgA* mutant  
362 relative to WT (Fig. 3B). The reduction in active FruA may be considerably greater than ninefold if the  
363 *dev* promoter region approaches saturation (e.g., 20-fold at 80% saturation in Fig. 5C). Also,  
364 mathematical modeling of our data at each time point from 18 to 30 h PS yields a similar result (Fig.  
365 S10), suggesting that in WT, FruA has already been activated by C-signaling at least ninefold by 18 h PS,

366 and perhaps as much as 30-fold if the *dev* promoter region approaches saturation (righthand panel in  
367 Fig. S10).

368

369 ***Stability of the dev transcript is unchanged in a csgA mutant***

370 To measure the *dev* transcript degradation rate in WT and the *csgA* mutant, we compared the *dev*  
371 transcript levels after addition of rifampicin to block transcription at 30 h PS. The average half-life of  
372 the *dev* transcript in three biological replicates was  $11 \pm 6$  min in WT and  $7 \pm 1$  min in the *csgA* mutant  
373 (Fig. 6), which is not a statistically significant difference ( $p = 0.36$  in a Student's unpaired, two-tailed  $t$ -  
374 test). We conclude that elevated turnover does not account for the low level of *dev* transcript in the  
375 *csgA* mutant. These results allow us to rule out Hypothesis 1.

376

377 ***The distal upstream binding site for MrpC and FruA has little impact on the dev transcript level***

378 In a previous study, weak cooperative binding of MrpC and FruA to a site located between positions -  
379 254 and -229 upstream of the *dev* promoter appeared to boost  $\beta$ -galactosidase activity from a *lacZ*  
380 transcriptional fusion about twofold between 24 and 30 h PS, but deletion of the distal upstream site  
381 did not impair spore formation (Campbell et al., 2015). These findings suggested that the distal site  
382 has a modest impact on *dev* transcription that is inconsequential for sporulation. However,  $\beta$ -  
383 galactosidase activity from *lacZ* fused to *dev* promoter segments with different amounts of upstream  
384 DNA and integrated ectopically may not accurately reflect the contribution of the distal site to the *dev*  
385 transcript level. Therefore, we measured the *dev* transcript level in a mutant lacking the distal site (i.e.,  
386 DNA between positions -254 and -228 was deleted from the *M. xanthus* chromosome). The level of  
387 *dev* transcript in the distal site mutant was similar to WT measured in the same experiment, in this

388 case increasing about twofold from 18 to 30 h PS (Fig. 7). Likewise, there were no significant  
389 differences between the distal site mutant and WT in the levels of *mrpC* or *fruA* transcripts (Fig. S6) or  
390 the corresponding proteins (Fig. S5), with the exception that the average MrpC level was twofold lower  
391 in the mutant than in WT at 30 PS. The distal site mutant formed mounds by 18 h PS, which matured  
392 into compact, darkened fruiting bodies at later times, similar to WT (Fig. S8), and the percentages of  
393 sonication-sensitive cells and sonication-resistant spores observed for the distal site mutant were  
394 similar to WT (Fig. S9). We conclude that the distal site has little or no impact on the developmental  
395 process. In particular, the distal site does not contribute to high cooperativity of MrpC and FruA  
396 binding to the *dev* promoter region that could explain the higher level of *dev* transcript in WT than in  
397 the *csgA* mutant. These results allow us to rule out Hypothesis 2.

398

### 399 ***Boosting the FruA level in the csgA mutant has no effect on the dev transcript level***

400 Having ruled out the first two hypotheses, our modeling predicts that the only viable option to explain  
401 the effect of the *csgA* null mutation on the *dev* transcript level is Hypothesis 3: at least a ninefold  
402 reduction in active FruA is needed in the *csgA* mutant as compared with WT. Specifically, our model  
403 showed that the low *dev* transcript level in the *csgA* mutant is not due to its twofold lower FruA level  
404 (Fig. 3B), but rather due to a failure to activate FruA in the absence of C-signaling (Fig. 5C and S10). As  
405 a result, the model predicts that in the *csgA* mutant most of the FruA remains inactive. To test this  
406 prediction, we integrated *fruA* transcriptionally fused to a vanillate-inducible promoter ectopically in  
407 the *csgA* mutant. Upon induction the *csgA*  $P_{van}$ -*fruA* strain accumulated a similar level of FruA as WT  
408 (Fig. 8A), but the *dev* transcript level remained as low as in the *csgA* mutant (Fig. 8B). Hence, boosting

409 the FruA level in the *csgA* mutant had no effect on the *dev* transcript level, consistent with our  
410 prediction and supporting the hypothesis that C-signaling activates FruA at least ninefold.

411 The boost in FruA level correlated with a boost in *fruA* transcript level in the *csgA*  $P_{van}$ -*fruA* strain at  
412 24 and 30 h PS (Fig. S11A). As expected, the *mrpC* transcript (Fig. S11B) and MrpC protein (Fig. S12)  
413 levels were similar in the *csgA*  $P_{van}$ -*fruA* strain as in the *csgA* mutant. Induction of the *csgA*  $P_{van}$ -*fruA*  
414 strain did not rescue its development since it failed to progress beyond forming loose aggregates (Fig.  
415 S13), failed to make a detectable number of spores by 48 h PS (at a detection limit of 0.01% of the  $T_0$   
416 number; data not shown), and appeared to be slightly delayed relative to WT in terms of the declining  
417 number of sonication-sensitive cells, like the *csgA* mutant (Fig. S14).

418 As a control,  $P_{van}$ -*fruA* was integrated ectopically in the *fruA* mutant. Upon induction the *fruA*  $P_{van}$ -  
419 *fruA* strain formed mounds by 18 h PS and the mounds matured into compact, darkened fruiting  
420 bodies at later times, similar to WT without or with vanillate added (Fig. S15). Also, the induced *fruA*  
421  $P_{van}$ -*fruA* strain exhibited a similar number of sonication-resistant spores as WT at 36 h PS. These  
422 results show that induction of the *fruA*  $P_{van}$ -*fruA* strain rescued its development, presumably because  
423 C-signaling activated FruA produced from  $P_{van}$ -*fruA*.

424

## 425 Discussion

426 Our systematic, quantitative analysis of a key circuit in the GRN governing *M. xanthus* fruiting body  
427 formation implicates posttranslational regulation of FruA by C-signaling as primarily responsible for *dev*  
428 transcript accumulation during the period leading up to and including commitment to spore formation.  
429 Mathematical modeling of the *dev* transcript level allowed us to predict the magnitude of potential  
430 regulatory mechanisms. Experiments ruled out C-signal-dependent stabilization of *dev* mRNA or highly

431 cooperative binding of FruA and MrpC to two sites in the *dev* promoter region as the explanation for  
432 the much higher *dev* transcript level in WT than in the *csgA* mutant. Although the FruA level was  
433 twofold lower in the *csgA* mutant than in WT (Fig. 3B and 8A), boosting the FruA level in the *csgA*  
434 mutant had no effect on the *dev* transcript level (Fig. 8B). Taken together, our experimental and  
435 computational analyses provide evidence that C-signaling activates FruA at least ninefold  
436 posttranslationally during *M. xanthus* development (Fig. 9). The activation of FruA may be  
437 considerably greater than ninefold if the *dev* promoter region approaches saturation (Fig. 5C and S10).  
438 Since efficient C-signaling requires cells to move into close proximity (Kim & Kaiser, 1990c, Kim &  
439 Kaiser, 1990b, Kroos et al., 1988), we propose that activation of FruA by C-signaling acts as a  
440 checkpoint for mound formation during the developmental process (Fig. 9).

441

#### 442 ***Regulation of FruA by C-signaling***

443 If activation of FruA by C-signaling acts as a checkpoint for mound formation, then active FruA should  
444 be present at 18 h PS since mound formation is well underway (Fig. 2). In agreement, mathematical  
445 modeling of our data using the assumptions of hypothesis 3 at each time point from 18 to 30 h PS  
446 yields a similar result (Fig. S10). This analysis implies that FruA has already been activated by C-  
447 signaling at least ninefold by 18 h PS, if the assumptions of hypothesis 3 apply. The assumption that  
448 the distal site does not contribute to high cooperativity of MrpC and FruA binding to the *dev* promoter  
449 region applies since the *dev* transcript level did not differ significantly in the distal site mutant as  
450 compared with WT at 18 or 24 h PS (Fig. 7). We did not measure *dev* transcript stability at 18 to 27 h  
451 PS, but at 30 h PS there was no significant difference between WT and the *csgA* mutant (Fig. 6).  
452 Therefore, C-signaling may have already activated FruA at least ninefold by 18 h PS, and perhaps as

453 much as 30-fold if the *dev* promoter region approaches saturation (90% saturation in the righthand  
454 panel of Fig. S10). We note that during the period from 18 to 30 h PS, the *dev* transcript level rises, but  
455 the rise is due to positive autoregulation by DevI (Fig. 4A). Hence, active FruA may not be the limiting  
456 factor for *dev* transcription during this period (i.e., the *dev* promoter region may indeed approach  
457 saturation binding of active FruA and MrpC). The proximal upstream site in the *dev* promoter region,  
458 which is crucial for transcriptional activation, exhibits a higher affinity for cooperative binding of FruA  
459 and MrpC than the distal upstream site (Campbell et al., 2015) or several other sites (Robinson et al.,  
460 2014, Son et al., 2011), perhaps conferring on *dev* transcription a relatively low threshold for active  
461 FruA.

462 The mechanism of FruA activation by C-signaling is unknown. Since FruA is similar to response  
463 regulators of two-component signal transduction systems, phosphorylation by a histidine protein  
464 kinase was initially proposed to control FruA activity (Ellehaug et al., 1998, Ogawa et al., 1996). While  
465 this potential mechanism of posttranslational control cannot be ruled out, a kinase capable of  
466 phosphorylating FruA has not been identified despite considerable effort. Moreover, the atypical  
467 receiver domain of FruA and the inability of small-molecule phosphodonors to increase its DNA-binding  
468 activity suggest that FruA may not be phosphorylated (Mittal & Kroos, 2009a).

469 Several atypical response regulators have been shown to be active without phosphorylation and a  
470 few are regulated by ligand binding (Bourret, 2010, Desai *et al.*, 2016). For example, the atypical  
471 receiver domain of *Streptomyces venezuelae* JadR1 is bound by jadomycin B, causing JadR1 to  
472 dissociate from DNA, and the acylated antibiotic undecylprodigiosin of *Streptomyces coelicolor* may  
473 use a similar mechanism to modulate DNA-binding activity of the atypical response regulator RedZ  
474 (Wang *et al.*, 2009). Conceivably, FruA activity could likewise be regulated by binding of *M. xanthus*

475 diacylglycerols, which have been implicated in C-signaling (Boynton & Shimkets, 2015). Alternatively,  
476 FruA could be regulated by a posttranslational modification other than phosphorylation or by binding  
477 to another protein (i.e., sequestration).

478 In addition to regulating FruA activity posttranslationally, C-signaling appears to regulate the FruA  
479 level posttranscriptionally. The FruA level was reproducibly twofold lower in the *csgA* mutant than in  
480 WT (Fig. 3B and 8A), but the *fruA* transcript level was not significantly different (Fig. 4C and S11A).  
481 These results suggest that positive posttranscriptional regulation of the FruA level requires C-signaling.  
482 C-signaling may increase synthesis (i.e., increase *fruA* mRNA accumulation slightly and also increase  
483 translation of *fruA* mRNA) and/or decrease turnover of FruA. We did not investigate this further  
484 because the FruA deficit in the *csgA* mutant could be overcome with  $P_{van}$ -*fruA*, yet there was very little  
485 effect on the *dev* transcript level (Fig. 8). This demonstrates that the activity of FruA, rather than its  
486 level, primarily controls the level of *dev* transcript.

487

#### 488 **Regulation by Dev proteins**

489 DevI inhibits sporulation if overexpressed, as in the *devS* mutant (Rajagopalan et al., 2015) (Fig. 2 and  
490 S1). Deletion of *devI* or the entire *dev* operon allows spores to begin forming about 6 h earlier than  
491 normal, but does not increase the final number of spores (Rajagopalan & Kroos, 2017) (Fig. S1). The  
492 level of MrpC was about twofold higher on average in the *devI* mutant than in WT at 15 h PS, perhaps  
493 accounting for the observed earlier sporulation, although the difference diminished at 18-24 h PS  
494 (Rajagopalan & Kroos, 2017), as reported here (Fig. 3A). It was concluded that DevI may transiently  
495 and weakly inhibit translation of *mrpC* transcripts during the period leading up to commitment,  
496 delaying sporulation (Rajagopalan & Kroos, 2017). As noted above, DevI positively autoregulates,

497 causing a small rise in the *dev* transcript level by 30 h PS (Fig. 4A, 7, and 8B). Although the mechanism  
498 of this feedback loop is unknown, one possibility is that DevI inhibits negative autoregulation by  
499 DevTRS (Fig. 9).

500 In previous studies, mutations in *devT*, *devR*, or *devS* relieved negative autoregulation, resulting in  
501 ~10-fold higher *dev* transcript accumulation at 24 h PS (Rajagopalan & Kroos, 2017, Rajagopalan et al.,  
502 2015). In this study, a *devS* mutant likewise accumulated ~10-fold more *dev* transcript than WT at 24-  
503 30 h PS, and the difference was ~20-fold at 18 and 21 h PS (Fig. 4A), suggesting that negative  
504 autoregulation mediated by DevS has a stronger effect leading up to the commitment period than  
505 during commitment. Strong negative autoregulation may promote commitment to sporulation by  
506 lowering the level of DevI, which would raise the MrpC level by relieving inhibition of translation of  
507 *mrpC* transcripts (Rajagopalan & Kroos, 2017). Our data suggest that negative autoregulation by  
508 DevTRS weakens during the commitment period, perhaps accounting for the observed small rise in the  
509 *dev* transcript level (Fig. 4A, 7, and 8B). If the elevated *dev* transcript level is accompanied by a small  
510 increase in the level of DevI, then DevI may inhibit translation of *mrpC* transcripts, causing the MrpC  
511 level to decrease slightly by 30 h PS in WT (Fig. 3A). DevI is predicted to be a 40-residue polypeptide  
512 (Rajagopalan et al., 2015) and currently no method has been devised to measure the DevI level. This is  
513 a worthwhile goal of future research, as is understanding how cells overcome DevI-mediated inhibition  
514 of sporulation (depicted in Fig. 9 as inhibition of cellular shape change).

515 In addition to regulating the timing of commitment to spore formation, Dev proteins appear to play  
516 a role in maturation of spores. Mutations in *dev* genes strongly impair expression of the *exo* operon  
517 (Licking *et al.*, 2000, Rajagopalan & Kroos, 2017), which encodes proteins that help form the



518 polysaccharide spore coat necessary to maintain cellular shape change and form mature spores (Muller  
519 *et al.*, 2012, Ueki & Inouye, 2005).

520

### 521 ***The role of MrpC***

522 Our results add to a growing list of observations that indicate MrpC functions differently during *M.*  
523 *xanthus* development than originally proposed. We found that MrpC negatively autoregulates  
524 accumulation of *mrpC* mRNA about twofold at 18 and 24 h PS (Fig. S6A), and it does so at 18 h PS  
525 without significantly altering transcript stability (Fig. S7). This contradicts an earlier study that  
526 concluded MrpC positively autoregulates, based on finding that expression of an *mrpC-lacZ* fusion was  
527 abolished in an *mrpC* mutant (Sun & Shi, 2001b). Recently, and in agreement with our result, it was  
528 reported that MrpC is a negative autoregulator that competes with MrpB for binding to the *mrpC*  
529 promoter region (McLaughlin *et al.*, 2018). MrpB, likely when phosphorylated, binds to two sites  
530 upstream of the *mrpC* promoter and activates transcription. MrpC binds to multiple sites upstream of  
531 the *mrpC* promoter (Nariya & Inouye, 2006, McLaughlin *et al.*, 2018), including two that overlap the  
532 MrpB binding sites (McLaughlin *et al.*, 2018). Purified MrpC competes with the MrpB DNA-binding  
533 domain for binding to the overlapping sites, supporting a model in which MrpC negatively  
534 autoregulates by directly competing with phosphorylated MrpB for binding to overlapping sites  
535 (McLaughlin *et al.*, 2018) (Fig. 9).

536 The role of MrpC in cellular lysis during development appears to be less prominent than originally  
537 proposed. MrpC was reported to function as an antitoxin by binding to and inhibiting activity of the  
538 MazF toxin protein, an mRNA interferase shown to be important for developmental programmed cell  
539 death (Nariya & Inouye, 2008). However, the effect of a null mutation in *mazF* on developmental lysis

540 depends on the presence of a *pilQ1* mutation (Boynton *et al.*, 2013, Lee *et al.*, 2012). In *pilQ*<sup>+</sup>  
541 backgrounds such as our WT strain DK1622, MazF is dispensable for lysis. Here, we found only a slight  
542 delay of the *mrpC* mutant relative to WT in terms of the declining number of sonication-sensitive cells  
543 at 18-48 h PS (Fig. S9A), comparable to other mutants (*csgA*, *fruA*, *devS*, *csgA P<sub>van</sub>-fruA*) that were  
544 unable to form spores (Fig. S1 and S13; data not shown). Under our conditions, MrpC appears to play  
545 no special role in modulating the cell number during development.

546 Both the synthesis and the degradation of MrpC are regulated. Synthesis is regulated by  
547 phosphorylated MrpB and MrpC acting positively and negatively, respectively, at the level of  
548 transcription initiation as described above (McLaughlin *et al.*, 2018) (Fig. 9). Degradation is regulated  
549 by the complex Esp signal transduction system (Cho & Zusman, 1999, Higgs *et al.*, 2008, Schramm *et*  
550 *al.*, 2012), which presumably senses a signal and controls the activity of an unidentified protease  
551 involved in MrpC turnover, thus ensuring that development proceeds at the appropriate pace (Fig. 9).  
552 Interestingly, preliminary results suggest that the Esp system does not govern the proteolysis of MrpC  
553 observed when nutrients are added at 18 h PS (Rajagopalan & Kroos, 2014) (Y. Hoang, R. Rajagopalan,  
554 and L. Kroos; unpublished data). This implies that another system senses nutrients and degrades MrpC  
555 to halt development (Fig. 9).

556

### 557 ***Combinatorial control by MrpC and FruA***

558 Nutrient-regulated proteolysis of MrpC provides a checkpoint for starvation during the period leading  
559 up to and including commitment to sporulation (Rajagopalan & Kroos, 2014) (Fig. 9). If activation of  
560 FruA by C-signaling acts as a checkpoint for mound formation as we propose (Fig. 9), then

561 combinatorial control by MrpC and activated FruA could ensure that only starving cells in mounds  
562 express genes that commit them to spore formation.

563 MrpC and FruA bind cooperatively to the promoter regions of five C-signal-dependent genes (Lee et  
564 al., 2011, Mittal & Kroos, 2009a, Mittal & Kroos, 2009b, Son et al., 2011, Campbell et al., 2015). In each  
565 case, cooperative binding to a site located just upstream of the promoter appears to activate  
566 transcription. Hence, MrpC and FruA form a type 1 coherent feed-forward loop with AND logic  
567 (Mangan & Alon, 2003). This type of loop is abundant in GRNs and can serve as a sign-sensitive delay  
568 element (Mangan & Alon, 2003, Mangan *et al.*, 2003). The sign sensitivity refers to a difference in the  
569 network response to stimuli in the “OFF to ON” direction versus the “ON to OFF” direction. What this  
570 means for the feed-forward loop created by MrpC, FruA, and their target genes is that target gene  
571 expression is delayed as MrpC accumulates, awaiting FruA activated by C-signaling (i.e., the “OFF to  
572 ON” direction) (Fig. 9). As cells move into mounds and engage in short-range C-signaling, activated  
573 FruA would bind cooperatively with MrpC, stimulating transcription of target genes that eventually  
574 commit cells to spore formation (depicted in Fig. 9 as cellular shape change). However, if nutrients  
575 reappear prior to commitment, MrpC is degraded and transcription of target genes rapidly ceases,  
576 halting commitment to sporulation (i.e., the “ON to OFF” direction). The number of target genes may  
577 be large since MrpC binds to the promoter regions of hundreds of developmental genes based on ChIP-  
578 seq analysis, and in 13 of 15 cases cooperative binding of MrpC and FruA was observed (Robinson et  
579 al., 2014).

580 In addition to the feed-forward loop involving cooperative binding of MrpC and FruA to a site  
581 located just upstream of the promoter, the promoter regions of some genes have more complex  
582 architectures that confer greater dependence on C-signaling for transcriptional activation. For

583 example, in the *fmgD* promoter region, binding of MrpC to an additional site that overlaps the  
584 promoter and the FruA binding site appears to repress transcription, and it has been proposed that a  
585 high level of active FruA produced by C-signaling is necessary to outcompete MrpC for binding and  
586 result in transcriptional activation (Lee et al., 2011) (Fig. S16A). In the *fmgE* promoter region, a distal  
587 upstream site with higher affinity for cooperative binding of MrpC and FruA appears to act negatively  
588 by competing for binding with the lower affinity site just upstream of the promoter (Son et al., 2011)  
589 (Fig. S16B). In addition to *fmgD* and *fmgE*, other genes depend more strongly on C-signaling and are  
590 expressed later during development than *dev* (Kroos & Kaiser, 1987). We infer that such genes require  
591 a higher level of active FruA than *dev* in order to be transcribed. In contrast to the *dev* promoter  
592 region, which may have a relatively low threshold for active FruA and therefore approach saturation  
593 binding of active FruA and MrpC at 18 h PS (Fig. S10), we predict that the promoter regions of genes  
594 essential for commitment to sporulation have more complex architectures and a higher threshold for  
595 active FruA. According to this model, C-signal-dependent activation of FruA continues after 18 h PS  
596 and the rising level of active FruA triggers commitment beginning at 24 h PS. We speculate that genes  
597 governing cellular shape change are under combinatorial control of MrpC and FruA (Fig. 9), and have a  
598 high threshold for active FruA.

599

## 600 **Experimental Procedures**

### 601 ***Bacterial strains, plasmids and primers***

602 The strains, plasmids, and primers used in this study are listed in Table S1. *Escherichia coli* strain DH5 $\alpha$   
603 was used for cloning. To construct pET1, primers FruA-F-NdeI-Gibson and FruA-R-EcoRI-Gibson were  
604 used to generate PCR products using chromosomal DNA from *M. xanthus* strain DK1622 as template.

605 The products were combined with NdeI-EcoRI-digested pMR3691 in a Gibson assembly reaction to  
606 enzymatically join the overlapping DNA fragments (Gibson *et al.*, 2009). The cloned PCR product was  
607 verified by DNA sequencing. *M. xanthus* strains with  $P_{van-fruA}$  integrated ectopically were constructed  
608 by electroporation (Kashefi & Hartzell, 1995) of pET1, selection of transformants on CTT agar  
609 containing 15 µg/ml of tetracycline (Iniesta *et al.*, 2012), and verification by colony PCR using primers  
610 pMR3691 MCS G-F and pMR3691 MCS G-R.

611

### 612 ***Growth and development of M. xanthus***

613 Strains of *M. xanthus* were grown at 32°C in CTTYE liquid medium (1% Casitone, 0.2% yeast extract, 10  
614 mM Tris-HCl [pH 8.0], 1 mM KH<sub>2</sub>PO<sub>4</sub>-K<sub>2</sub>HPO<sub>4</sub>, 8 mM MgSO<sub>4</sub> [final pH 7.6]) with shaking at 350 rpm. CTT  
615 agar (CTTYE lacking yeast extract and solidified with 1.5% agar) was used for growth on solid medium  
616 and was supplemented with 40 µg/ml of kanamycin sulfate or 15 µg/ml of tetracycline as required.  
617 Fruiting body development under submerged culture conditions was performed using MC7 (10 mM  
618 morpholinepropanesulfonic acid [MOPS; pH 7.0], 1 mM CaCl<sub>2</sub>) as the starvation buffer as described  
619 previously (Rajagopalan & Kroos, 2014). Briefly, log-phase CTTYE cultures were centrifuged and cells  
620 were resuspended in MC7 at a density of approximately 1,000 Klett units. A 100 µl sample (designated  
621 T<sub>0</sub>) was removed, glutaraldehyde (2% final concentration) was added to fix cells, and the sample was  
622 stored at 4°C at least 24 h before total cells were quantified as described below. For each  
623 developmental sample, 1.5 ml of the cell suspension plus 10.5 ml of MC7 was added to an 8.5-cm-  
624 diameter plastic petri plate. Upon incubation at 32°C, cells adhere to the bottom of the plate and  
625 undergo development. At the indicated times developing populations were photographed through a  
626 microscope and collected as described below.

627

628 ***Microscopy***

629 Images of fruiting bodies were obtained using a Leica Wild M8 microscope equipped with an Olympus  
630 E-620 digital camera. In order to quantify cells in samples collected and dispersed as described below,  
631 high resolution images were obtained with an Olympus BX51 microscope using a differential  
632 interference contrast filter and a 40× objective lens, and equipped with an Olympus DP30BW digital  
633 camera.

634

635 ***Sample collection***

636 At the indicated times the submerged culture supernatant was replaced with 5 ml of fresh MC7  
637 starvation buffer with or without inhibitors as required. Developing cells were scraped from the plate  
638 bottom using a sterile cell scraper and the entire contents were collected in a 15-ml centrifuge tube.  
639 Samples were mixed thoroughly by repeatedly (three times total) vortexing for 15 s followed by  
640 pipetting up and down 15 times. For quantification of total cells, 100 µl of the mixture was removed,  
641 glutaraldehyde (2% final concentration) was added to fix cells, and the sample was stored at 4°C for at  
642 least 24 h before counting as described below. For measurement of sonication-resistant spores, 400 µl  
643 of the mixture was removed and stored at -20°C. For immunoblot analysis, 100 µl of the mixture was  
644 added to an equal volume of 2× sample buffer (0.125 M Tris-HCl [pH 6.8], 20% glycerol, 4% sodium  
645 dodecyl sulfate [SDS], 0.2% bromophenol blue, 0.2 M dithiothreitol), boiled for 5 min, and stored at -  
646 20°C. Immediately after collecting the three samples just described, the remaining 4.4 ml of the  
647 developing population was mixed with 0.5 ml of RNase stop solution (5% phenol [pH < 7] in ethanol),  
648 followed by rapid cooling in liquid nitrogen until almost frozen, centrifugation at 8,700 × g for 10 min at

649 4°C, removal of the supernatant, freezing of the cell pellet in liquid nitrogen, and storage at -80°C until  
650 RNA extraction. Control experiments with a sample collected at 30 h PS indicated that the majority of  
651 spores remain intact after boiling in 2× sample buffer or RNA extraction as described below, so the  
652 proteins and RNAs analyzed are from developing cells that have not yet formed spores.

653

#### 654 ***Quantification of total cells and sonication-resistant spores***

655 During development a small percentage of the rod-shaped cells transition to ovoid spores that become  
656 sonication-resistant. The number of sonication-resistant spores in developmental samples was  
657 quantified as described previously (Rajagopalan & Kroos, 2014). Briefly, each 400-μl sample collected  
658 as described above was thawed and sonicated for 10-s intervals three times with cooling on ice in  
659 between. A 60 μl sample was removed and ovoid spores were counted microscopically using a  
660 Neubauer counting chamber. A remaining portion of the sample was used to determine total protein  
661 concentration as described below. The total cell number, including rod-shaped cells, ovoid spores, and  
662 cells in transition between the two, was determined using the glutaraldehyde-fixed samples collected  
663 as described above. Each sample was thawed and mixed by vortexing and pipetting, then 10 or 20 μl  
664 was diluted with MC7 to 400 μl, sonicated once for 10 s, and all cells were counted microscopically.  
665 The total cell number minus the number of sonication-resistant cells was designated the number of  
666 sonication-sensitive cells (consisting primarily of rod-shaped cells) and was expressed as a percentage  
667 of the total cell number in the corresponding T<sub>0</sub> sample (consisting only of rod-shaped cells).

668

#### 669 ***RNA extraction and analysis***

670 RNA was extracted using the hot-phenol method and the RNA was digested with DNase I (Roche) as  
671 described previously (Higgs et al., 2008). One  $\mu\text{g}$  of total RNA was subjected to cDNA synthesis using  
672 Superscript III reverse transcriptase (Invitrogen) and random primers (Promega), according to the  
673 instructions provided by the manufacturers. Control reactions were not subjected to cDNA synthesis.  
674 One  $\mu\text{l}$  of cDNA at the appropriate dilution (as determined empirically) and 20 pmol of each primer  
675 were subjected to qPCR in a 25  $\mu\text{l}$  reaction using 2 $\times$  reaction buffer (20 mM Tris-HCl [pH 8.3], 13 mM  
676  $\text{MgCl}_2$ , 100 mM KCl, 400  $\mu\text{M}$  dNTPs, 4% DMSO, 2 $\times$  SYBR Green I [Molecular Probes], 0.01% Tween 20,  
677 0.01% NP40, and 0.01  $\mu\text{g}/\mu\text{l}$  of Taq polymerase) as described previously (Bryant *et al.*, 2008). qPCR  
678 was done in quadruplicate for each cDNA using a LightCycler<sup>®</sup> 480 System (Roche). A standard curve  
679 was generated for each set of qPCRs using *M. xanthus* wild-type strain DK1622 genomic DNA and gene  
680 expression was quantified using the relative standard curve method (user bulletin 2; Applied  
681 Biosystems). 16S rRNA was used as the internal standard for each sample. Relative transcript levels  
682 for mutants are the average of three biological replicates after each replicate was normalized to the  
683 transcript level observed for one replicate of wild type at 18 h PS in the same experiment. Transcript  
684 levels for wild type at other times PS were likewise normalized to that observed for wild type at 18 h PS  
685 in the same experiment. Since each experiment had one replicate of wild type, the relative transcript  
686 levels for wild type at times other than 18 h PS are the average of at least three biological replicates  
687 from different experiments, yet the standard deviations of these measurements were comparable to  
688 those of mutants, for which three biological replicates were measured in the same experiment. The  
689 standard deviation of the measurements for wild type at 18 h were also comparable, but in this case  
690 the transcript levels of at least three biological replicates from different experiments were normalized  
691 to their average, which was set as 1.



692

693 ***Immunoblot analysis***

694 A semi-quantitative method of immunoblot analysis was devised to measure the relative levels of  
695 MrpC and FruA in many samples collected in different experiments. Equal volumes (10  $\mu$ l for  
696 measurement of MrpC and 15  $\mu$ l for measurement of FruA) of samples prepared for immunoblot  
697 analysis as described above were subjected to SDS-PAGE and immunoblotting as described previously  
698 (Rajagopalan & Kroos, 2014, Yoder-Himes & Kroos, 2006). On each immunoblot, a sample of the wild-  
699 type strain DK1622 at 18 h PS served as an internal control for normalization of signal intensities across  
700 immunoblots. Signals were detected using a ChemiDoc MP imaging system (Bio-Rad), with exposure  
701 times short enough to ensure signals were not saturated, and signal intensities were quantified using  
702 Image Lab 5.1 (Bio-Rad) software. After normalization to the internal control, each signal intensity was  
703 divided by the total protein concentration of a corresponding sample that had been sonicated for 10-s  
704 intervals three times as described above. After removal of a sample for spore quantification, the  
705 remaining portion was centrifuged at 10,000  $\times g$  for 1 min and the total protein concentration of the  
706 supernatant was determined using a Bradford (Bradford, 1976) assay kit (Bio-Rad). The resulting  
707 values of normalized signal intensity/total protein concentration were further normalized to the  
708 average value for all biological replicates of wild type at 18 h PS, which was set as 1. The normalized  
709 values for at least three biological replicates were used to compute the relative protein level (average  
710 and standard deviation). As observed for the relative transcript levels, the standard deviations of the  
711 relative protein levels were comparable for mutants (three biological replicates in the same  
712 experiment) and wild type (at least three biological replicates from different experiments).

713

714 **Mathematical modeling**

715 *Activation of dev transcription by FruA and MrpC*

716 FruA and MrpC bind cooperatively to the *dev* promoter region and activate transcription (Campbell et  
717 al., 2015). In agreement, no *dev* mRNA was detected in either the *fruA* mutant (Fig. 4A) or the *mrpC*  
718 mutant (Fig. 7). We represent the activation of *dev* transcript by FruA and MrpC using a  
719 phenomenological Hill's function,

720 
$$\Pi_{\text{FM}} = \alpha_{\text{FM}} \left[ \frac{\left( \frac{[\text{FruA}][\text{MrpC}]}{K_{\text{FM}}} \right)^a}{1 + \left( \frac{[\text{FruA}][\text{MrpC}]}{K_{\text{FM}}} \right)^a} \right]$$

721 where  $\alpha_{\text{FM}}$  denotes the maximal *dev* transcription rate,  $K_{\text{FM}}$  is the half-saturation constant, and  $a$   
722 denotes the cooperativity of binding. Note that this expression will give  $\Pi_{\text{FM}} = 0$  when  $[\text{FruA}] = 0$  or  
723  $[\text{MrpC}] = 0$  (i.e., we have neglected any basal transcription rate as we did not detect *dev* mRNA in the  
724 *fruA* or *mrpC* mutant. The expression in brackets can be thought as the promoter occupancy probability  
725 ( $P$  in the equation below), a dimensional parameter telling what fraction of the promoters will be  
726 occupied by the transcription factors for a given value of  $K_{\text{FM}}$ .

727 
$$P = \frac{\left( \frac{[\text{FruA}][\text{MrpC}]}{K_{\text{FM}}} \right)^a}{1 + \left( \frac{[\text{FruA}][\text{MrpC}]}{K_{\text{FM}}} \right)^a}$$

728

729 Note that the sensitivity of this expression to changes in the concentrations of FruA and MrpC are  
730 maximal when  $P \sim 0$  and minimal near saturation when  $P \sim 1$ . In Figure 5 we assess how different  
731 hypotheses about the role of C-signaling in *dev* regulation play out at different levels of  $K_{\text{FM}}$ . To facilitate  
732 the biological interpretation of the findings, we plot these as a function of *dev* promoter saturation.

733

734 *Feedback regulation by Dev proteins*

735 The *dev* mRNA level is further regulated by Dev proteins DevI and DevS. Our finding that the *dev*  
 736 transcript level is lower in the *devI* mutant than in WT (Fig. 4A) indicates that DevI is a positive regulator  
 737 of *dev* mRNA accumulation. In contrast, the *dev* transcript level in the *devS* mutant is significantly higher  
 738 than in WT (Fig. 4A), indicating that DevS is a negative regulator of *dev* mRNA accumulation. Since the  
 739 exact mechanisms of regulation by DevI and DevS are unclear, we assume for simplicity that these  
 740 proteins regulate the *dev* transcript level through independent mechanisms. We model these regulation  
 741 functions as follows:

$$742 \quad \Pi_I = \left( 1 + \alpha_I \frac{\left( \frac{[\text{DevI}]}{K_I} \right)^b}{1 + \left( \frac{[\text{DevI}]}{K_I} \right)^b} \right), \quad \Pi_S = \left( \frac{1}{1 + \left( \frac{[\text{DevS}]}{K_S} \right)^c} \right)$$

743 Note that these functions are normalized so that  $\Pi_I = 1$  for the *devI* mutant and  $\Pi_S = 1$  for the *devS*  
 744 mutant (i.e., when  $[\text{DevI}] = 0$  or  $[\text{DevS}] = 0$ ).

745 We assume that regulation by the Dev proteins is independent of that by FruA and MrpC, and the  
 746 effects will be multiplicative:

$$747 \quad [\text{mRNA}_{dev}] = \frac{\alpha_{FM}}{\delta_{dev}} \underbrace{\left( \frac{\left( \frac{[\text{FruA}][\text{MrpC}]}{K_{FM}} \right)^a}{1 + \left( \frac{[\text{FruA}][\text{MrpC}]}{K_{FM}} \right)^a} \right)}_{\Pi_{FM}} \underbrace{\left( 1 + \alpha_I \frac{\left( \frac{[\text{DevI}]}{K_I} \right)^b}{1 + \left( \frac{[\text{DevI}]}{K_I} \right)^b} \right)}_{\Pi_I} \underbrace{\left( \frac{1}{1 + \left( \frac{[\text{DevS}]}{K_S} \right)^c} \right)}_{\Pi_S}$$

748 where,  $K_{FM}$ ,  $K_I$ , and  $K_S$  are the saturation constants for regulation by  $[\text{FruA}][\text{MrpC}]$ ,  $[\text{DevI}]$ , and  $[\text{DevS}]$ ,  
 749 respectively.

750

751 *Numerical procedure to estimate unknown regulation parameters*

752 To explain the difference in the *dev* mRNA level in the *csgA* mutant as compared with WT, in terms of  
 753 perturbation of potential regulatory mechanisms, we use a mathematical approach where we constrain  
 754 the FruA ratio ( $[\text{FruA}]_{\text{WT}}/[\text{FruA}]_{\text{csgA}} \cong 2$ ) and find the regulation parameters that can result in the  
 755 observed 22-fold difference in  $[\text{mRNA}_{\text{dev}}]$ . Specifically, we use the expression of *dev* transcript ratio  
 756 between WT and the *csgA* mutant below:

$$\begin{aligned}
 & \frac{[\text{mRNA}_{\text{dev}}]_{\text{WT}}}{[\text{mRNA}_{\text{dev}}]_{\text{csgA}}} \\
 &= \frac{\delta_{\text{dev,csgA}}}{\delta_{\text{dev,WT}}} \frac{1 + \left( \frac{[\text{FruA}]_{\text{csgA}}[\text{MrpC}]_{\text{csgA}}}{K_{\text{FM}}} \right)^a}{1 + \left( \frac{[\text{FruA}]_{\text{WT}}[\text{MrpC}]_{\text{WT}}}{K_{\text{FM}}} \right)^a} \left( \frac{[\text{FruA}]_{\text{WT}}[\text{MrpC}]_{\text{WT}}}{[\text{FruA}]_{\text{csgA}}[\text{MrpC}]_{\text{csgA}}} \right)^a \left( \frac{\Pi_{\text{I,WT}} \Pi_{\text{S,WT}}}{\Pi_{\text{I,csgA}} \Pi_{\text{S,csgA}}} \right) \\
 & \frac{[\text{mRNA}_{\text{dev}}]_{\text{WT}}}{[\text{mRNA}_{\text{dev}}]_{\text{csgA}}} = \frac{1}{\delta_R} \left( \frac{R^a + \left( \frac{P_{\text{WT}}}{1 - P_{\text{WT}}} \right)}{1 + \left( \frac{P_{\text{WT}}}{1 - P_{\text{WT}}} \right)} \right) \left( \frac{\Pi_{\text{I,WT}} \Pi_{\text{S,WT}}}{\Pi_{\text{I,csgA}} \Pi_{\text{S,csgA}}} \right)
 \end{aligned}$$

760 where,

$$R = \frac{[\text{FruA}]_{\text{WT}}}{[\text{FruA}]_{\text{csgA}}} \frac{[\text{MrpC}]_{\text{WT}}}{[\text{MrpC}]_{\text{csgA}}}, \delta_R = \frac{\delta_{\text{dev,WT}}}{\delta_{\text{dev,csgA}}} \text{ and } P_{\text{WT}} = \frac{\left( \frac{[\text{FruA}]_{\text{WT}}[\text{MrpC}]_{\text{WT}}}{K_{\text{FM}}} \right)^a}{1 + \left( \frac{[\text{FruA}]_{\text{WT}}[\text{MrpC}]_{\text{WT}}}{K_{\text{FM}}} \right)^a}.$$

762 First, we estimate the contribution from Dev protein regulation terms ( $\Pi_{\text{I}}, \Pi_{\text{S}}$ ) in determining the *dev*  
 763 transcript level in WT and the *csgA* mutant. Since we did not measure the Dev proteins explicitly in our  
 764 experiments, we estimate their contribution in regulating *dev* transcription in WT by comparing the  
 765 changes in transcript level in their absence (i.e., in the *devI* and *devS* mutants). Based on our transcript  
 766 data for WT, and the *devI* and *devS* mutants (Fig. 4A), we have the following relations between the  
 767 regulation functions;  $[\text{mRNA}_{\text{dev}}]_{\text{WT}} = \delta_{\text{dev,WT}}^{-1} \Pi_{\text{FM,WT}} \Pi_{\text{I,WT}} \Pi_{\text{S,WT}} = 2.9$ ,  $\delta_{\text{dev,WT}}^{-1} \Pi_{\text{FM,WT}} \Pi_{\text{S,WT}} =$   
 768  $1$  and  $\delta_{\text{dev,WT}}^{-1} \Pi_{\text{FM,WT}} \Pi_{\text{I,WT}} = 32$ . Using these relations, we obtain  $\Pi_{\text{I,WT}} = 2.9$ ,  $\Pi_{\text{S,WT}} = 0.091$ . For  
 769 the *csgA* mutant, assuming regulation by Dev proteins is absent due to the low *dev* transcript level, we

770 have  $\Pi_{I,csgA} \approx 1$  and  $\Pi_{S,csgA} \approx 1$ . With these estimates, the above expression for *dev* transcript ratio  
771 has three unknown parameters  $\delta_R$ ,  $a$ ,  $P_{WT}$ .

772 Next, we determine the required fold change in degradation rate  $\delta_R$  for different promoter  
773 saturation probability  $P_{WT}$  values that explains the observed 22-fold difference in *dev* transcript. To  
774 estimate this, we set the cooperativity constant ( $a$ ) to 2 and take the fold change in FruA from the  
775 experiments, while assuming MrpC is unchanged between WT and the *csgA* mutant. The result is  
776 plotted in Fig. 5A. Then, we determine the required cooperativity  $a$  for different  $P_{WT}$  values with the  
777 FruA fold change from the experiments and assuming no change in the degradation rate ( $\delta_R = 1$ ). The  
778 result is plotted in Fig. 5B. Finally, we compute the fold change in FruA with  $\delta_R = 1$  and  $a = 2$  for  
779 different  $P_{WT}$  values. The result is shown in Fig. 5C.

780

### 781 **RNA stability**

782 At the indicated time the submerged culture supernatant was replaced with fresh MC7 starvation  
783 buffer supplemented with 50  $\mu\text{g/ml}$  of rifampicin to inhibit RNA synthesis. Samples were collected  
784 immediately (designated  $t_0$ ) and 8 and 16 min later for RNA extraction and analysis as described above,  
785 except for each biological replicate the transcript levels after 8 and 16 min were normalized to the  
786 transcript level at  $t_0$ , which was set as 1, and the natural log of the resulting values was plotted versus  
787 minutes after rifampicin treatment and the slope of a linear fit of the data was used to compute the  
788 mRNA half-life.

789

### 790 **Induction of $P_{van-fruA}$**

791 To induce expression of *fruA* fused to a vanillate-inducible promoter in *M. xanthus*, the CTTYE growth  
792 medium was supplemented with 0.5 mM vanillate when the culture reached 50 Klett units. Growth  
793 was continued until the culture reached 100 Klett units, then the culture was centrifuged and cells  
794 were resuspended at a density of approximately 1,000 Klett units in MC7 supplemented with 0.5 mM  
795 vanillate, followed by submerged culture development as described previously (Rajagopalan & Kroos,  
796 2014).

797

### 798 **Acknowledgements**

799 We thank Monique Floer for advice about high-throughput qPCR and for use of the LightCycler® 480  
800 System. We thank Emily Titus for constructing pET1 and *M. xanthus* strain MET1. We thank  
801 Montserrat Elias-Arnanz and Penelope Higgs for sharing strains. This work was supported by the  
802 National Science Foundation (award MCB-1411272) and by salary support for L.K. from Michigan State  
803 University AgBioResearch.

804

### 805 **Author contributions**

806 Conception or design of the study: LK, OI, SS, PP

807 Acquisition of the data: SS, PP

808 Analysis or interpretation of the data: SS, PP, LK, OI

809 Writing of the manuscript: LK, SS, PP, OI

810

811 **Graphical abstract**

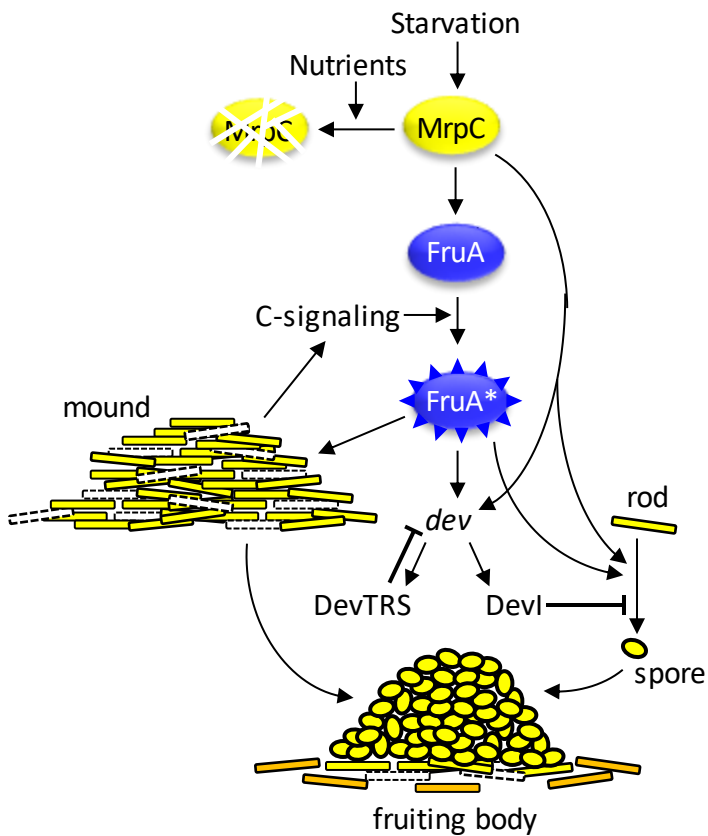

812

813 **Abbreviated summary**

814 Starvation promotes MrpC accumulation, whereas nutrients favor proteolysis. MrpC activates transcription of  
815 *fruA*, but FruA protein appears to be activated by short-range C-signaling in a cycle leading to mound formation  
816 and lysis of some cells. Activated FruA\* and MrpC are proposed to cooperatively stimulate transcription of the  
817 *dev* operon and genes that commit starving rod-shaped cells to form spores, while Dev proteins slow  
818 commitment, resulting in a spore-filled fruiting body surrounded by peripheral rods.

819

820 **References**

- 821 Barratt, M. J., C. Lebrilla, H. Y. Shapiro & J. I. Gordon, (2017) The gut microbiota, food science, and  
822 human nutrition: a timely marriage. *Cell Host Microbe* **22**: 134-141.
- 823 Bourret, R. B., (2010) Receiver domain structure and function in response regulator proteins. *Curr.*  
824 *Opin. Microbiol.* **13**: 142-149.
- 825 Boynton, T. O., J. L. McMurry & L. J. Shimkets, (2013) Characterization of *Myxococcus xanthus* MazF  
826 and implications for a new point of regulation. *Mol. Microbiol.* **87**: 1267-1276.
- 827 Boynton, T. O. & L. J. Shimkets, (2015) *Myxococcus* CsgA, *Drosophila* Sniffer and human HSD17B10 are  
828 cardiolipin phospholipases. *Genes Dev.* **29**: 1903-1914.
- 829 Boysen, A., E. Ellehaug, B. Julien & L. Sogaard-Andersen, (2002) The DevT protein stimulates synthesis  
830 of FruA, a signal transduction protein required for fruiting body morphogenesis in *Myxococcus*  
831 *xanthus*. *J. Bacteriol.* **184**: 1540-1546.
- 832 Bradford, M., (1976) A rapid and sensitive method for the quantitation of microgram quantities of  
833 protein utilizing the principle of protein-dye binding. *Anal. Biochem.* **72**: 248-254.
- 834 Bretl, D. J. & J. R. Kirby, (2016) Molecular mechanisms of signaling in *Myxococcus xanthus*  
835 development. *J. Mol. Biol.* **428**: 3805-3830.
- 836 Bryant, G. O., V. Prabhu, M. Floer, X. Wang, D. Spagna, D. Schreiber & M. Ptashne, (2008) Activator  
837 control of nucleosome occupancy in activation and repression of transcription. *PLoS Biol.* **6**:  
838 2928-2939.
- 839 Bush, M. J., N. Tschowri, S. Schlimpert, K. Flardh & M. J. Buttner, (2015) c-di-GMP signalling and the  
840 regulation of developmental transitions in streptomycetes. *Nat. Rev. Microbiol.* **13**: 749-760.



- 841 Campbell, A., P. Viswanathan, T. Barrett, B. Son, S. Saha & L. Kroos, (2015) Combinatorial regulation of  
842 the *dev* operon by MrpC2 and FruA during *Myxococcus xanthus* development. *J. Bacteriol.* **197**:  
843 240-251.
- 844 Cho, K. & D. R. Zusman, (1999) Sporulation timing in *Myxococcus xanthus* is controlled by the *espAB*  
845 locus. *Mol. Microbiol.* **34**: 714-725.
- 846 Davidson, E. H. & M. S. Levine, (2008) Properties of developmental gene regulatory networks. *Proc.*  
847 *Natl. Acad. Sci. USA* **105**: 20063-20066.
- 848 Desai, S. K., R. S. Winardhi, S. Periasamy, M. M. Dykas, Y. Jie & L. J. Kenney, (2016) The horizontally-  
849 acquired response regulator SsrB drives a *Salmonella* lifestyle switch by relieving biofilm  
850 silencing. *eLife* **5**: e10747.
- 851 Drapek, C., E. E. Sparks & P. N. Benfey, (2017) Uncovering gene regulatory networks controlling plant  
852 cell differentiation. *Trends Genet.* **33**: 529-539.
- 853 Ellehauge, E., M. Norregaard-Madsen & L. Sogaard-Andersen, (1998) The FruA signal transduction  
854 protein provides a checkpoint for the temporal co-ordination of intercellular signals in  
855 *Myxococcus xanthus* development. *Mol. Microbiol.* **30**: 807-817.
- 856 Frum, T. & A. Ralston, (2015) Cell signaling and transcription factors regulating cell fate during  
857 formation of the mouse blastocyst. *Trends Genet.* **31**: 402-410.
- 858 Gibson, D. G., L. Young, R. Y. Chuang, J. C. Venter, C. A. Hutchison, 3rd & H. O. Smith, (2009) Enzymatic  
859 assembly of DNA molecules up to several hundred kilobases. *Nat. Methods* **6**: 343-345.
- 860 Higgs, P. I., S. Jagadeesan, P. Mann & D. R. Zusman, (2008) EspA, an orphan hybrid histidine protein  
861 kinase, regulates the timing of expression of key developmental proteins of *Myxococcus*  
862 *xanthus*. *J. Bacteriol.* **190**: 4416-4426.

- 863 Iniesta, A. A., F. Garcia-Heras, J. Abellon-Ruiz, A. Gallego-Garcia & M. Elias-Arnanz, (2012) Two systems  
864 for conditional gene expression in *Myxococcus xanthus* inducible by isopropyl- $\beta$ -D-  
865 thiogalactopyranoside or vanillate. *J. Bacteriol.* **194**: 5875-5885.
- 866 Jansson, J. K. & K. S. Hofmockel, (2018) The soil microbiome-from metagenomics to metaphenomics.  
867 *Curr. Opin. Microbiol.* **43**: 162-168.
- 868 Kashefi, K. & P. Hartzell, (1995) Genetic suppression and phenotypic masking of a *Myxococcus xanthus*  
869 *frzF* defect. *Molec. Microbiol.* **15**: 483-494.
- 870 Kim, S. K. & D. Kaiser, (1990a) C-factor: a cell-cell signaling protein required for fruiting body  
871 morphogenesis of *M. xanthus*. *Cell* **61**: 19-26.
- 872 Kim, S. K. & D. Kaiser, (1990b) Cell alignment required in differentiation of *Myxococcus xanthus*.  
873 *Science* **249**: 926-928.
- 874 Kim, S. K. & D. Kaiser, (1990c) Cell motility is required for the transmission of C-factor, an intercellular  
875 signal that coordinates fruiting body morphogenesis of *Myxococcus xanthus*. *Genes Dev.* **4**: 896-  
876 905.
- 877 Kroos, L., (2017) Highly signal-responsive gene regulatory network governing *Myxococcus*  
878 development. *Trends Genet.* **33**: 3-15.
- 879 Kroos, L., P. Hartzell, K. Stephens & D. Kaiser, (1988) A link between cell movement and gene  
880 expression argues that motility is required for cell-cell signaling during fruiting body  
881 development. *Genes Dev.* **2**: 1677-1685.
- 882 Kroos, L. & D. Kaiser, (1987) Expression of many developmentally regulated genes in *Myxococcus*  
883 depends on a sequence of cell interactions. *Genes Dev.* **1**: 840-854.

- 884 Lee, B., C. Holkenbrink, A. Treuner-Lange & P. I. Higgs, (2012) *Myxococcus xanthus* developmental cell  
885 fate production: heterogeneous accumulation of developmental regulatory proteins and  
886 reexamination of the role of MazF in developmental lysis. *J. Bacteriol.* **194**: 3058-3068.
- 887 Lee, J., B. Son, P. Viswanathan, P. Luethy & L. Kroos, (2011) Combinatorial regulation of *fmgD* by MrpC2  
888 and FruA during *Myxococcus xanthus* development. *J. Bacteriol.* **193**: 1681-1689.
- 889 Licking, E., L. Gorski & D. Kaiser, (2000) A common step for changing cell shape in fruiting body and  
890 starvation-independent sporulation of *Myxococcus xanthus*. *J. Bacteriol.* **182**: 3553-3558.
- 891 Lobedanz, S. & L. Sogaard-Andersen, (2003) Identification of the C-signal, a contact-dependent  
892 morphogen coordinating multiple developmental responses in *Myxococcus xanthus*. *Genes Dev.*  
893 **17**: 2151-2161.
- 894 Mangan, S. & U. Alon, (2003) Structure and function of the feed-forward loop network motif. *Proc.*  
895 *Natl. Acad. Sci. USA* **100**: 11980-11985.
- 896 Mangan, S., A. Zaslaver & U. Alon, (2003) The coherent feedforward loop serves as a sign-sensitive  
897 delay element in transcription networks. *J. Mol. Biol.* **334**: 197-204.
- 898 McLaughlin, P. T., V. Bhardwaj, B. E. Feeley & P. I. Higgs, (2018) MrpC, a CRP/Fnr homolog, functions as  
899 a negative autoregulator during the *Myxococcus xanthus* multicellular developmental program.  
900 *Mol. Microbiol.* **Epub ahead of print.**
- 901 Mittal, S. & L. Kroos, (2009a) A combination of unusual transcription factors binds cooperatively to  
902 control *Myxococcus xanthus* developmental gene expression. *Proc. Natl. Acad. Sci. USA* **106**:  
903 1965-1970.
- 904 Mittal, S. & L. Kroos, (2009b) Combinatorial regulation by a novel arrangement of FruA and MrpC2  
905 transcription factors during *Myxococcus xanthus* development. *J. Bacteriol.* **191**: 2753-2763.

- 906 Muller, F. D., C. W. Schink, E. Hoiczky, E. Cserti & P. I. Higgs, (2012) Spore formation in *Myxococcus*  
907 *xanthus* is tied to cytoskeleton functions and polysaccharide spore coat deposition. *Mol.*  
908 *Microbiol.* **83**: 486-505.
- 909 Nariya, H. & M. Inouye, (2008) MazF, an mRNA interferase, mediates programmed cell death during  
910 multicellular *Myxococcus* development. *Cell* **132**: 55-66.
- 911 Nariya, H. & S. Inouye, (2005) Identification of a protein Ser/Thr kinase cascade that regulates essential  
912 transcriptional activators in *Myxococcus xanthus* development. *Mol. Microbiol.* **58**: 367-379.
- 913 Nariya, H. & S. Inouye, (2006) A protein Ser/Thr kinase cascade negatively regulates the DNA-binding  
914 activity of MrpC, a smaller form of which may be necessary for the *Myxococcus xanthus*  
915 development. *Mol. Microbiol.* **60**: 1205-1217.
- 916 Norman, T. M., N. D. Lord, J. Paulsson & R. Losick, (2015) Stochastic switching of cell fate in microbes.  
917 *Annu. Rev. Microbiol.* **69**: 381-403.
- 918 O'Connor, K. A. & D. R. Zusman, (1991) Development in *Myxococcus xanthus* involves differentiation  
919 into two cell types, peripheral rods and spores. *J. Bacteriol.* **173**: 3318-3333.
- 920 Ogawa, M., S. Fujitani, X. Mao, S. Inouye & T. Komano, (1996) FruA, a putative transcription factor  
921 essential for the development of *Myxococcus xanthus*. *Mol. Microbiol.* **22**: 757-767.
- 922 Rajagopalan, R. & L. Kroos, (2014) Nutrient-regulated proteolysis of MrpC halts expression of genes  
923 important for commitment to sporulation during *Myxococcus xanthus* development. *J.*  
924 *Bacteriol.* **196**: 2736-2747.
- 925 Rajagopalan, R. & L. Kroos, (2017) The *dev* operon regulates the timing of sporulation during  
926 *Myxococcus xanthus* development. *J. Bacteriol.* **199**: e00788-00716.

- 927 Rajagopalan, R., S. Wielgoss, G. Lippert, G. J. Velicer & L. Kroos, (2015) *devI* is an evolutionarily young  
928 negative regulator of *Myxococcus xanthus* development. *J Bacteriol* **197**: 1249-1262.
- 929 Robinson, M., B. Son & L. Kroos, (2014) Transcription factor MrpC binds to promoter regions of many  
930 developmentally-regulated genes in *Myxococcus xanthus*. *BMC Genomics* **15**: 1123.
- 931 Rolbetzki, A., M. Ammon, V. Jakovljevic, A. Konovalova & L. Sogaard-Andersen, (2008) Regulated  
932 secretion of a protease activates intercellular signaling during fruiting body formation in *M.*  
933 *xanthus*. *Dev. Cell* **15**: 627-634.
- 934 Sager, B. & D. Kaiser, (1993) Two cell-density domains within the *Myxococcus xanthus* fruiting body.  
935 *Proc. Natl. Acad. Sci. USA* **90**: 3690-3694.
- 936 Schramm, A., B. Lee & P. I. Higgs, (2012) Intra- and inter-protein phosphorylation between two hybrid  
937 histidine kinases controls *Myxococcus xanthus* developmental progression. *J. Biol. Chem.* **287**:  
938 25060–25072.
- 939 Shimkets, L. J., R. E. Gill & D. Kaiser, (1983) Developmental cell interactions in *Myxococcus xanthus* and  
940 the *spoC* locus. *Proc. Natl. Acad. Sci. USA* **80**: 1406-1410.
- 941 Son, B., Y. Liu & L. Kroos, (2011) Combinatorial regulation by MrpC2 and FruA involves three sites in the  
942 *fmgE* promoter region during *Myxococcus xanthus* development. *J. Bacteriol.* **193**: 2756-2766.
- 943 Srinivasan, D. & L. Kroos, (2004) Mutational analysis of the *fruA* promoter region demonstrates that C-  
944 box and 5-base-pair elements are important for expression of an essential developmental gene  
945 of *Myxococcus xanthus*. *J. Bacteriol.* **186**: 5961-5967.
- 946 Stock, A. M., V. L. Robinson & P. N. Goudreau, (2000) Two-component signal transduction. *Annu. Rev.*  
947 *Biochem.* **69**: 183-215.

- 948 Sun, H. & W. Shi, (2001a) Analyses of *mrp* genes during *Myxococcus xanthus* development. *J. Bacteriol.*  
949 **183**: 6733-6739.
- 950 Sun, H. & W. Shi, (2001b) Genetic studies of *mrp*, a locus essential for cellular aggregation and  
951 sporulation of *Myxococcus xanthus*. *J. Bacteriol.* **183**: 4786-4795.
- 952 Thony-Meyer, L. & D. Kaiser, (1993) *devRS*, an autoregulated and essential genetic locus for fruiting  
953 body development in *Myxococcus xanthus*. *J. Bacteriol.* **175**: 7450-7462.
- 954 Ueki, T. & S. Inouye, (2003) Identification of an activator protein required for the induction of *fruA*, a  
955 gene essential for fruiting body development in *Myxococcus xanthus*. *Proc. Natl. Acad. Sci. USA*  
956 **100**: 8782-8787.
- 957 Ueki, T. & S. Inouye, (2005) Identification of a gene involved in polysaccharide export as a transcription  
958 target of FruA, an essential factor for *Myxococcus xanthus* development. *J. Biol. Chem.* **280**:  
959 32279-32284.
- 960 van Gestel, J., H. Vlamakis & R. Kolter, (2015) Division of labor in biofilms: the ecology of cell  
961 differentiation. *Microbiol. Spectr.* **3**: MB-0002-2014.
- 962 Viswanathan, P., K. Murphy, B. Julien, A. G. Garza & L. Kroos, (2007a) Regulation of *dev*, an operon that  
963 includes genes essential for *Myxococcus xanthus* development and CRISPR-associated genes  
964 and repeats. *J. Bacteriol.* **189**: 3738-3750.
- 965 Viswanathan, P., T. Ueki, S. Inouye & L. Kroos, (2007b) Combinatorial regulation of genes essential for  
966 *Myxococcus xanthus* development involves a response regulator and a LysR-type regulator.  
967 *Proc. Natl. Acad. Sci. USA* **104**: 7969-7974.

968 Wang, L., X. Tian, J. Wang, H. Yang, K. Fan, G. Xu, K. Yang & H. Tan, (2009) Autoregulation of antibiotic  
969 biosynthesis by binding of the end product to an atypical response regulator. *Proc Natl Acad Sci*  
970 *U S A* **106**: 8617-8622.

971 Yang, Z. & P. Higgs, (2014) *Myxobacteria: genomics, cellular and molecular biology*. Norfolk, UK:  
972 Caister Academic Press.

973 Yoder-Himes, D. & L. Kroos, (2006) Regulation of the *Myxococcus xanthus* C-signal-dependent  $\Omega$ 4400  
974 promoter by the essential developmental protein FruA. *J. Bacteriol.* **188**: 5167-5176.

975

## 976 **Figure Legends**

977 **Fig. 1.** Simplified model of the gene regulatory network governing formation of fruiting bodies.

978 Starvation increases the level of MrpC early in the process. MrpC causes an increase in C-signal, the  
979 product of *csgA*. MrpC activates transcription of the gene for FruA, and C-signal somehow enhances  
980 FruA and/or MrpC activity. MrpC and FruA bind cooperatively to the promoter region of the *dev*  
981 operon and activate transcription. The resulting DevTRS proteins negatively autoregulate. DevI delays  
982 spore formation within nascent fruiting bodies, but if overproduced, DevI inhibits sporulation, which is  
983 promoted by MrpC and FruA activity.

984

985 **Fig. 2.** Development of *M. xanthus* strains. Wild-type DK1622 and its indicated mutant derivatives  
986 were subjected to starvation under submerged culture conditions and images were obtained at the  
987 indicated number of hours poststarvation (PS). DK1622 formed mounds by 18 h PS (an arrow points to  
988 one) and the mounds began to darken by 27 h PS. The *csgA* and *fruA* mutants failed to form mounds,  
989 the *devI* mutant was similar to DK1622, and the *devS* mutant formed mounds later, by 24 h PS, but the

990 mounds failed to darken at later times. Bar, 100  $\mu\text{m}$ . Similar results were observed in at least three  
991 biological replicates.

992

993 **Fig. 3.** Levels of MrpC and FruA during *M. xanthus* development. Wild-type DK1622 and its indicated  
994 mutant derivatives were subjected to starvation under submerged culture conditions and samples  
995 were collected at the indicated number of hours poststarvation (PS) for measurement of MrpC (A) and  
996 FruA (B) by immunoblot. Bars show the average of at least three biological replicates, relative to wild-  
997 type DK1622 at 18 h PS, and error bars show one standard deviation.

998

999 **Fig. 4.** Transcript levels during *M. xanthus* development. Wild-type DK1622 and its indicated mutant  
1000 derivatives were subjected to starvation under submerged culture conditions and samples were  
1001 collected at the indicated number of hours poststarvation (PS) for measurement of *dev* (A), *mrpC* (B),  
1002 and *fruA* (C) transcript levels by RT-qPCR. Bars show the average of at least three biological replicates,  
1003 relative to wild-type DK1622 at 18 h PS, and error bars show one standard deviation.

1004

1005 **Fig. 5.** Mathematical modeling of different hypotheses to explain the low *dev* transcript level in a *csgA*  
1006 mutant. Plots showing the required fold change in *dev* transcript degradation rate in the *csgA* mutant  
1007 in comparison to wild type (A), cooperativity coefficient for MrpC and FruA binding to the *dev*  
1008 promoter region (B), and reduction in FruA activity in the *csgA* mutant in comparison to wild type (C),  
1009 to explain the experimental data for different values of promoter saturation.

1010



1011 **Fig. 6.** *dev* transcript stability. Wild-type DK1622 and the *csgA* mutant were subjected to starvation  
1012 under submerged culture conditions for 30 h. The overlay was replaced with fresh starvation buffer  
1013 containing rifampicin (50 µg/ml) and samples were collected immediately ( $t_0$ ) and at the times  
1014 indicated ( $t_x$ ) for measurement of the *dev* transcript level by RT-qPCR. Transcript levels at  $t_x$  were  
1015 normalized to that at  $t_0$  for each of three biological replicates and used to determine the transcript  
1016 half-life for each replicate. The average half-life and one standard deviation are reported in the text.  
1017 The graph shows the average  $\ln(t_x/t_0)$  and one standard deviation for the three biological replicates of  
1018 wild type (black dashed line) and the *csgA* mutant (gray solid line).

1019

1020 **Fig. 7.** *dev* transcript levels. Wild-type DK1622 and its indicated mutant derivative were subjected to  
1021 starvation under submerged culture conditions and samples were collected at the indicated number of  
1022 hours poststarvation (PS) for measurement of *dev* transcript levels by RT-qPCR. Bars show the average  
1023 of at least three biological replicates, relative to wild-type DK1622 at 18 h PS, and error bars show one  
1024 standard deviation.

1025

1026 **Fig. 8.** FruA protein and *dev* transcript levels. Wild-type DK1622 and its indicated mutant derivatives  
1027 were subjected to starvation under submerged culture conditions and samples were collected at the  
1028 indicated number of hours poststarvation (PS) for measurement of FruA levels by immunoblot (A) and  
1029 *dev* transcript levels by RT-qPCR (B). Bars show the average of at least three biological replicates,  
1030 relative to wild-type DK1622 at 18 h PS, and error bars show one standard deviation.

1031

1032 **Fig. 9.** Updated model of the gene regulatory network governing formation of fruiting bodies. Relative  
1033 to the simplified model shown in Figure 1 (see legend), this model also includes phosphorylated MrpB  
1034 (MrpB-P) which appears to activate transcription of *mrpC*, and negative autoregulation by MrpC which  
1035 appears to involve competition with MrpB-P for binding to overlapping sites in the *mrpC* promoter  
1036 region; proteolysis of MrpC, which is regulated by the Esp signal transduction system that normally  
1037 slows the developmental process and is regulated by nutrient addition that can halt development;  
1038 posttranslational activation of FruA to FruA\* by C-signaling and promotion of mound formation by  
1039 FruA\*, thus enhancing short-range C-signaling by bringing cells into proximity; the possibility that DevI  
1040 inhibits negative autoregulation by DevTRS; and speculation that the feed-forward loop involving MrpC  
1041 and FruA\* not only controls transcription of the *dev* operon, but that of genes involved in cellular  
1042 shape change as well, committing cells to spore formation and resulting in spore-filled fruiting bodies.  
1043 This model deletes activation of MrpC by C-signaling, which was included as a possibility in Figure 1,  
1044 but was not supported by our data. See the text for details and references.

Fig. 1

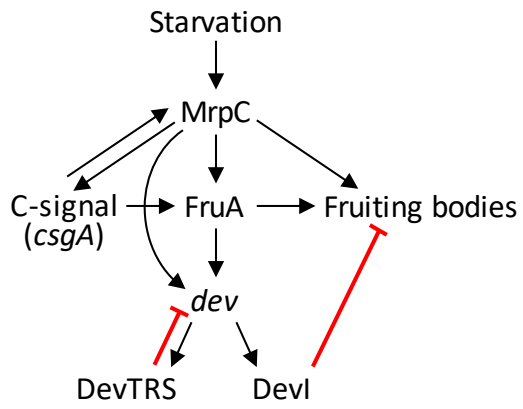

Fig. 2

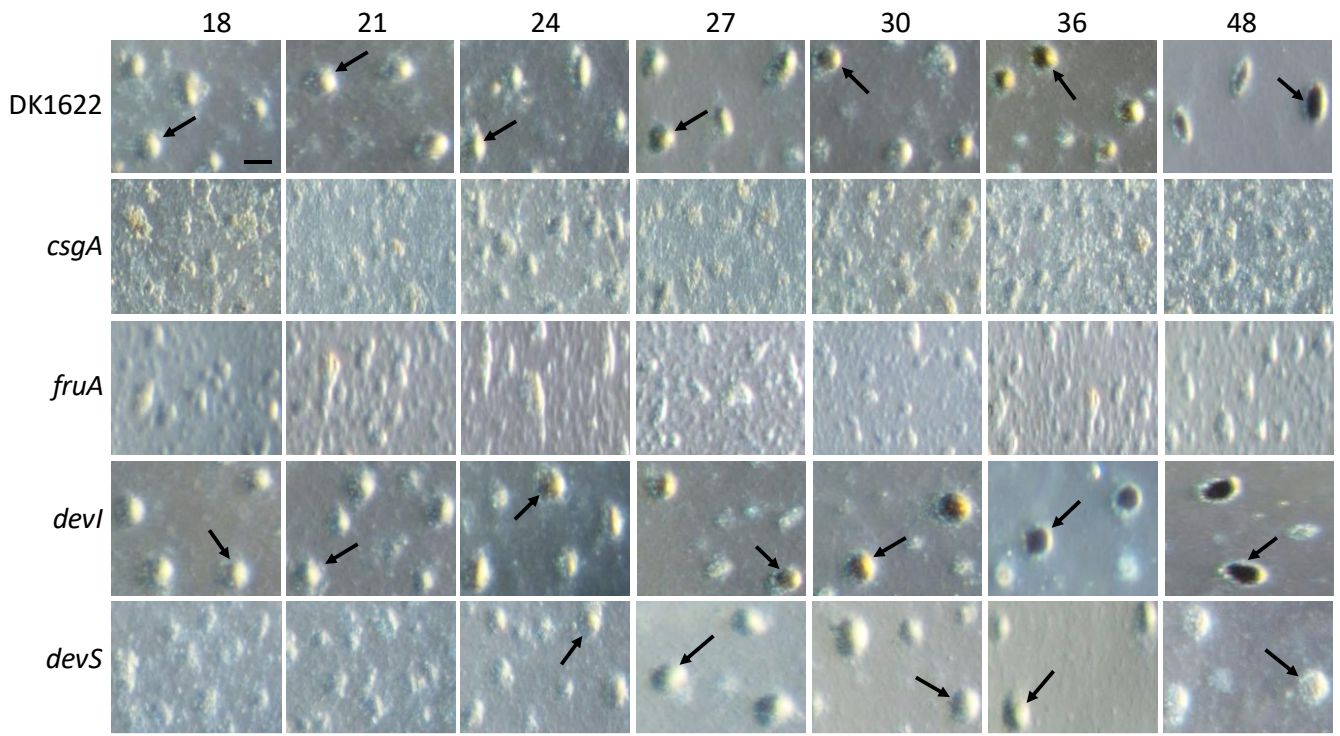

Fig. 3

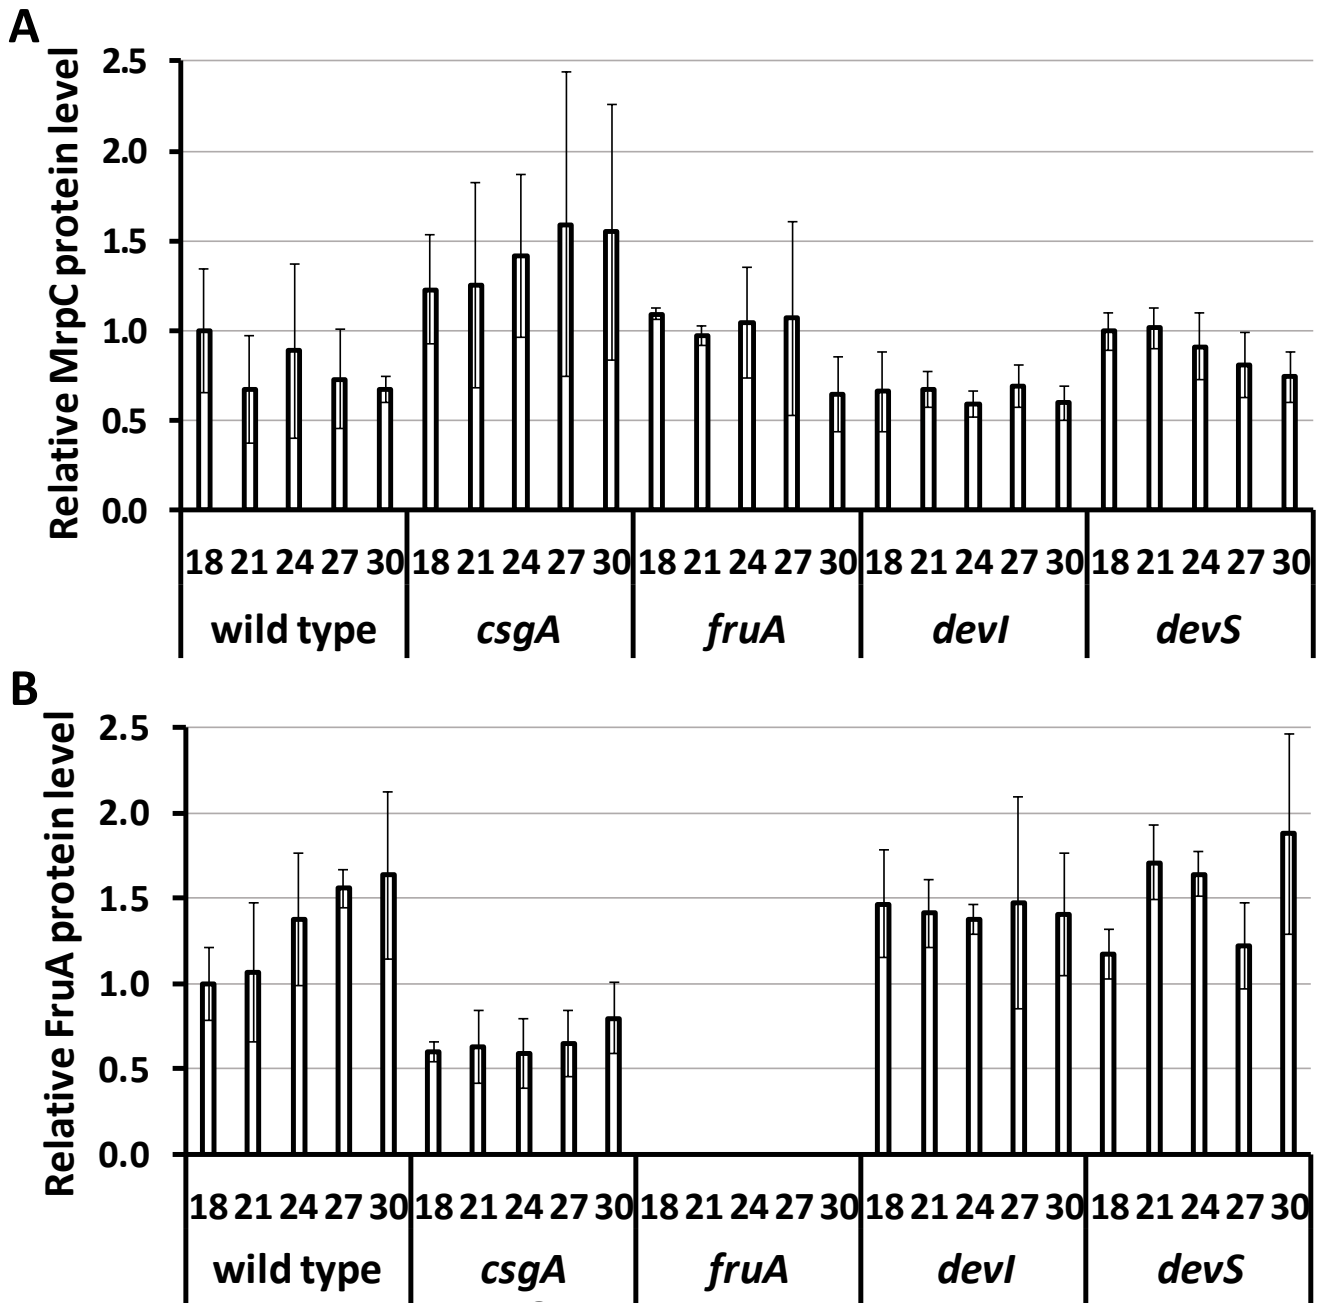

Fig. 4

**A**

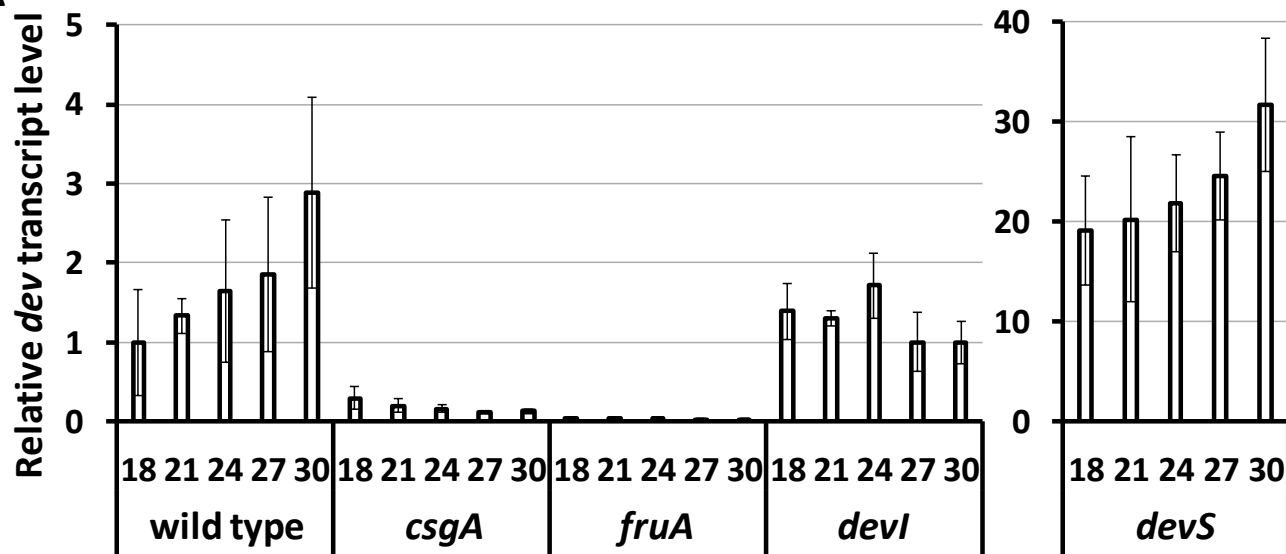

**B**

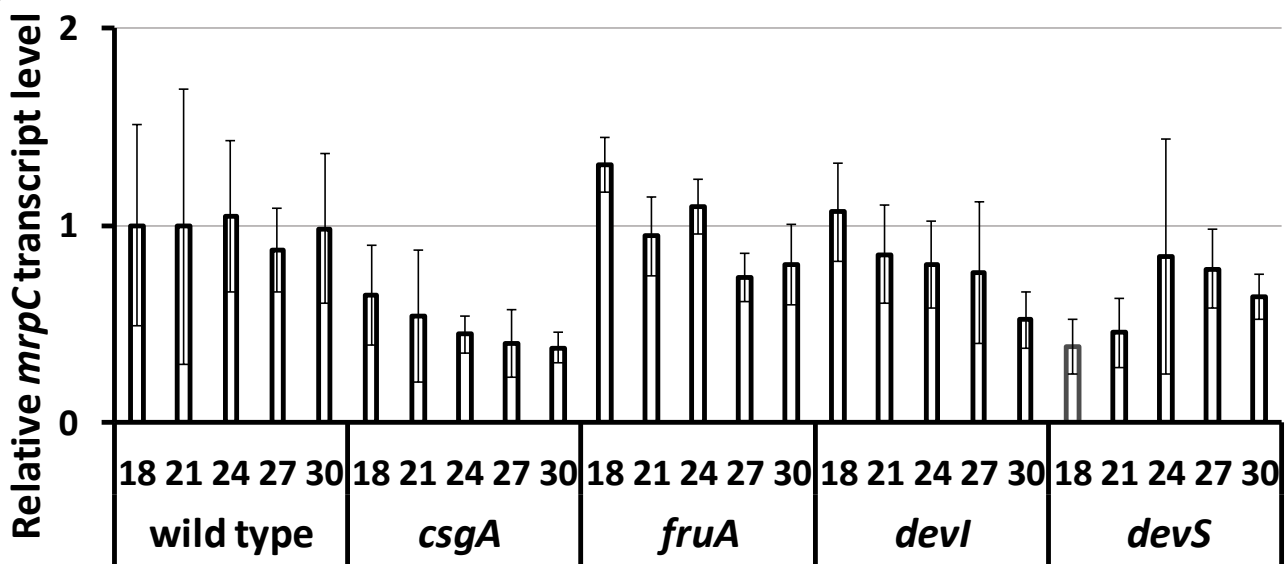

**C**

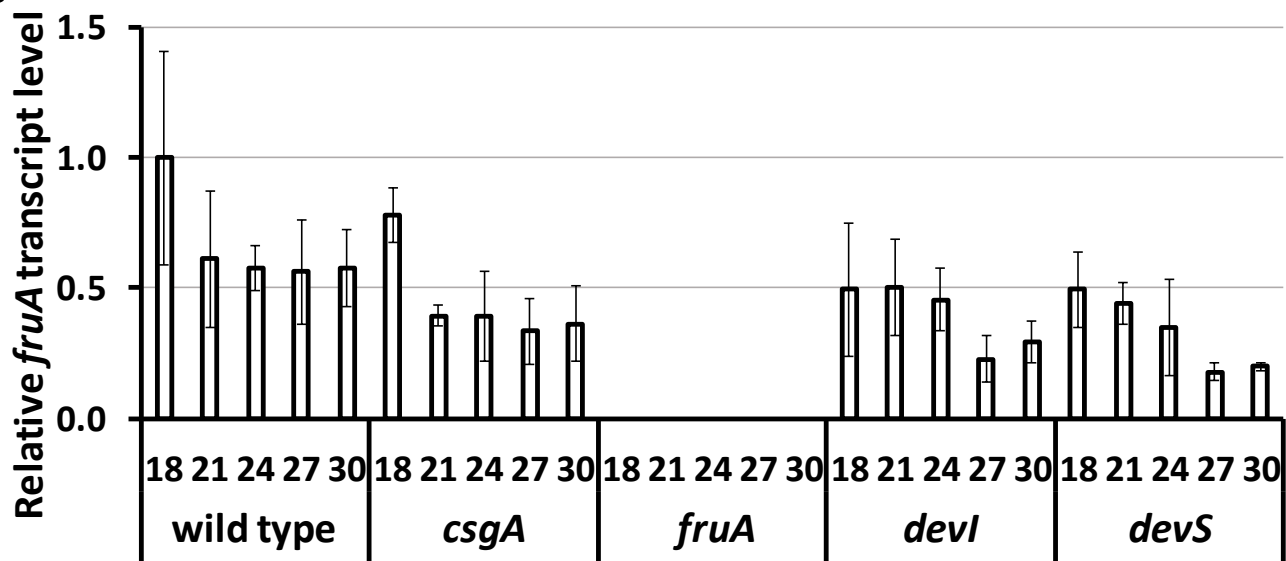

Fig. 5

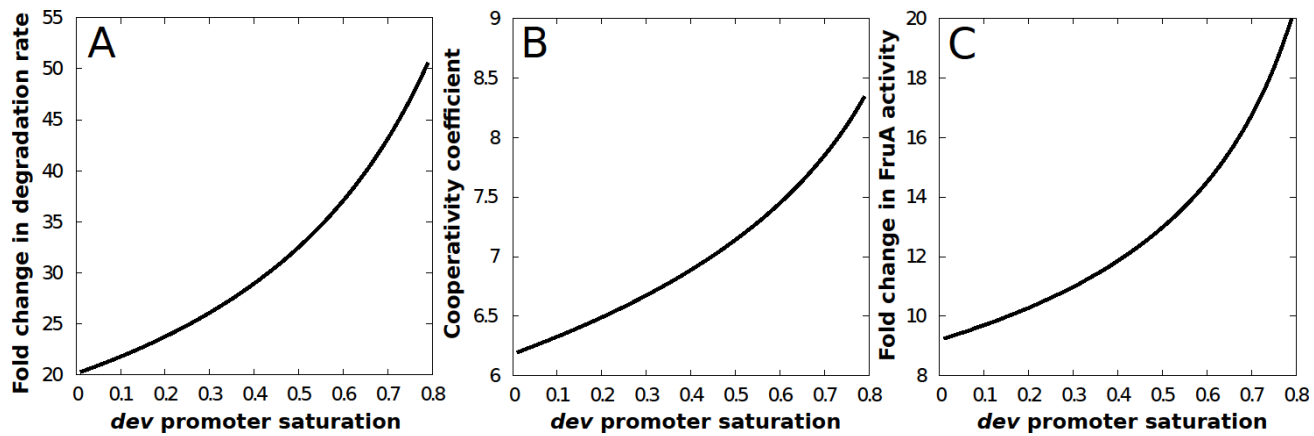

Fig. 6

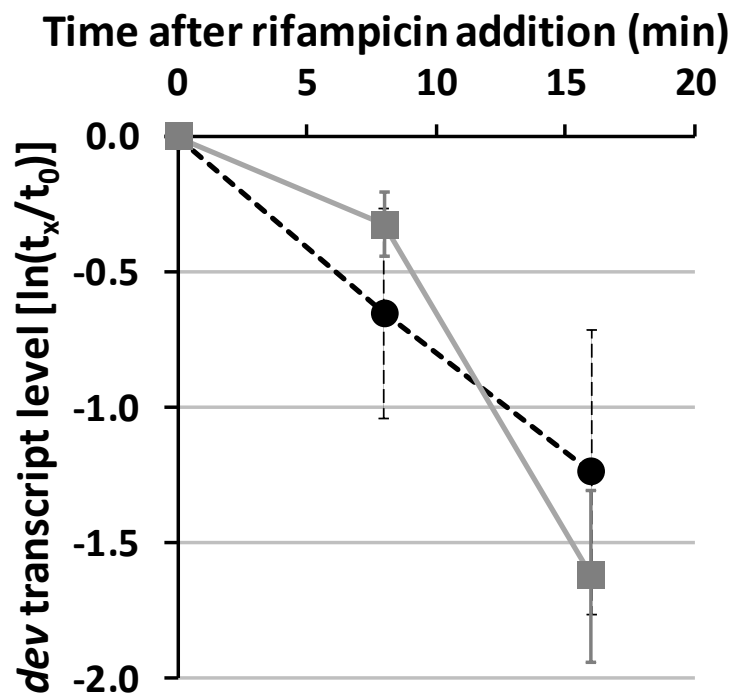



Fig. 7

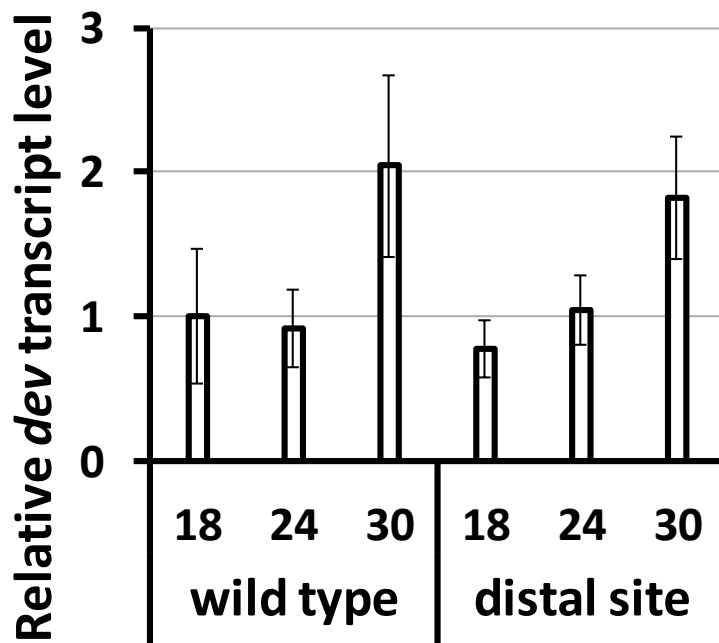

Fig. 8

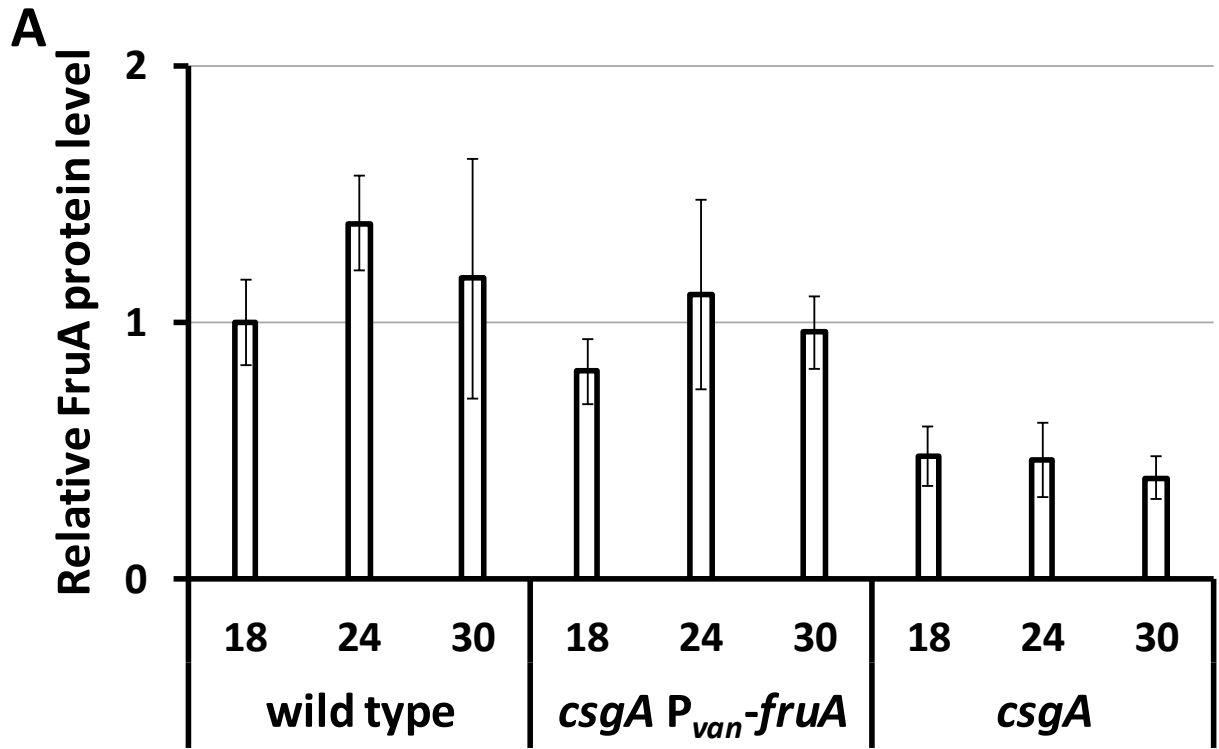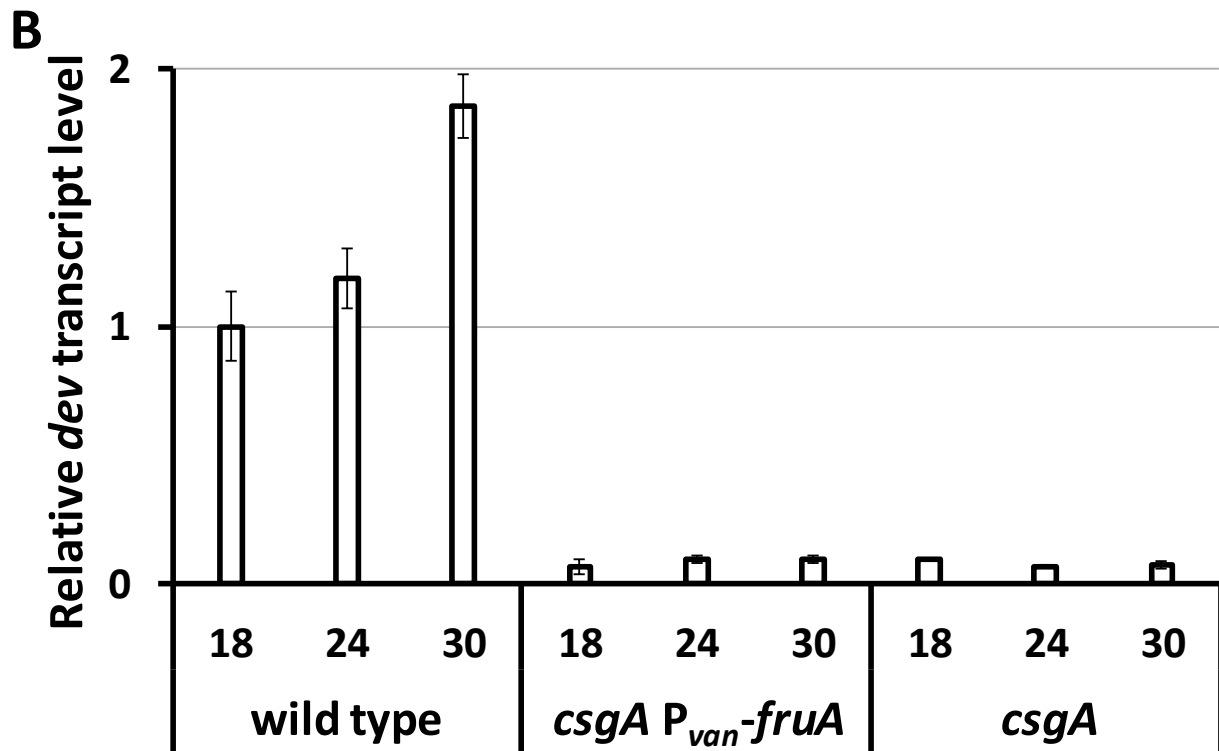

Fig. 9

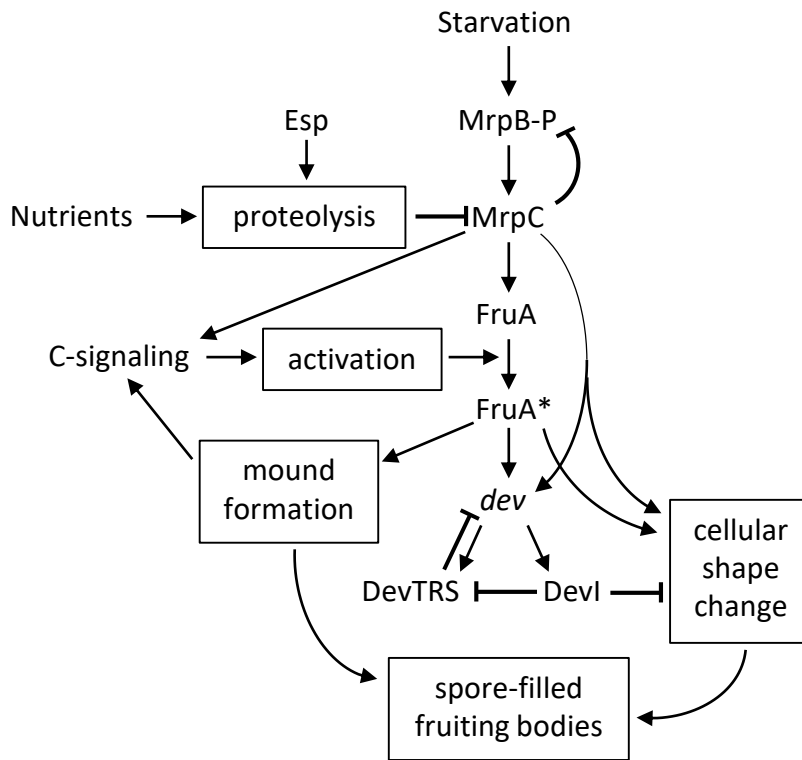

Source: http://biorxiv.org/content/10.1101/415331v1.full.pdf
